# Supplementary material for: LncRNA profile study reveals a three-lncRNA signature associated with the survival of patients with oesophageal squamous cell carcinoma
Source: PubMed Central journal article supplement — Gut. 2014 Feb 12;63(11):1700–10. doi: 10.1136/gutjnl-2013-305806 (PMC4215280; doi:10.1136/gutjnl-2013-305806), 2014-02-12
Supplement: gutjnl-2013-305806-s4.pdf [file gutjnl-2013-305806-s4.pdf]

**Supplementary Table 1. Clinical pathologic characteristics of the original cohort of 119 ESCC patients and the independent validation cohort of 60 ESCC patients.**

|                                    | Original cohort (n=119) | Independent cohort (n=60) |
|------------------------------------|-------------------------|---------------------------|
| <b>Age, median(IQR)</b>            | 59.0 (13.0)             | 60.0 (13.0)               |
| <b>Gender, male</b>                | 98 (82.4%)              | 48 (80.0%)                |
| <b>Tobacco use, yes</b>            | 80 (67.2%)              | 34 (56.7%)                |
| <b>Alcohol use, yes</b>            | 74 (62.2%)              | 32 (53.3%)                |
| <b>Tumor location</b>              |                         |                           |
| <b>Upper</b>                       | 14 (11.8%)              | 6 (10.0%)                 |
| <b>Middle</b>                      | 96 (58.0%)              | 28 (46.7%)                |
| <b>Lower</b>                       | 36 (30.3%)              | 26 (43.3%)                |
| <b>Tumor grade</b>                 |                         |                           |
| <b>Well</b>                        | 23 (19.3%)              | 9 (15.0%)                 |
| <b>Moderately</b>                  | 64 (53.8%)              | 34 (56.7%)                |
| <b>Poorly</b>                      | 32 (26.9%)              | 17 (28.3%)                |
| <b>T stage</b>                     |                         |                           |
| <b>T1</b>                          | 8 (6.7%)                | 4 (6.7%)                  |
| <b>T2</b>                          | 20 (16.8%)              | 7 (11.7%)                 |
| <b>T3</b>                          | 62 (52.1%)              | 48 (80.0%)                |
| <b>T4</b>                          | 29 (24.4%)              | 1 (1.7%)                  |
| <b>N stage</b>                     |                         |                           |
| <b>No</b>                          | 54 (45.4%)              | 29 (48.3%)                |
| <b>N1</b>                          | 42 (35.3%)              | 20 (33.3%)                |
| <b>N2</b>                          | 13 (10.9%)              | 9 (15.0%)                 |
| <b>N3</b>                          | 10 (8.4%)               | 2 (3.3%)                  |
| <b>TNM stage</b>                   |                         |                           |
| <b>I</b>                           | 6 (5.0%)                | 4 (6.7%)                  |
| <b>II</b>                          | 46 (39.5%)              | 30 (50.0%)                |
| <b>III</b>                         | 66 (55.5%)              | 26 (43.3%)                |
| <b>Tumor clearance</b>             |                         |                           |
| <b>R0</b>                          | 119 (100%)              | 60 (100%)                 |
| <b>R1/R2</b>                       | 0                       | 0                         |
| <b>Post-operative complication</b> |                         |                           |
| <b>Pneumonia</b>                   | 12 (10.1%)              | 3 (5.0%)                  |
| <b>Anastomotic leak</b>            | 11 (9.2%)               | 1 (1.7%)                  |
| <b>Arrhythmia</b>                  | 27(22.7%)               | 16 (26.7%)                |
| <b>Adjuvant therapy</b>            |                         |                           |
| <b>Yes</b>                         | 69 (58.0%)              | 35 (58.3%)                |
| <b>No</b>                          | 24 (20.2%)              | 21 (35.0%)                |
| <b>Unknown</b>                     | 26 (21.8%)              | 4 (6.7%)                  |
| <b>Median survival (mo)</b>        | 32.25                   | 39.50                     |

IQR: interquartile range. Data are n (%).
