# Supplementary material for: LncRNA profile study reveals a three-lncRNA signature associated with the survival of patients with oesophageal squamous cell carcinoma
Source: HighWire-hosted journal article supplement (doi:10.1136/gutjnl-2013-305806), 2014-02-12
Supplement: gutjnl-2013-305806supp2.pdf [file gutjnl-2013-305806supp2.pdf]

1 **Supplementary Results**

2

3 **Validation of microarray expression value by quantitative RT-PCR**

4 In order to validate the lncRNA expression value measured by microarray, we performed  
 5 quantitative RT-PCR (qRT-PCR) of the three lncRNAs of the signature in 25 randomly selected  
 6 tumor samples. Comparison of the expression values measured by qRT-PCR and microarray  
 7 showed high level of positive correlation. The Pearson correlation coefficient of  
 8 ENST00000435885.1, XLOC\_013014, and ENST00000547963.1 were 0.74 (p<0.0001), 0.46  
 9 (p=0.0211) and 0.51 (p=0.0089), respectively (Supplementary Figure 2). This result indicates that  
 10 the lncRNA expression level measured by microarray is reliable.

11

12 **Correlation of expression level among lncRNAs in the four-lncRNA and three-lncRNA signatures**

13 As mentioned in the method, in order to select the final prognostic signature, we compared the  
 14 performances of k-lncRNA signature in the training set for all k=1,2,...,9 and the signatures with  
 15 the best accuracies for each k was defined as the k-lncRNA signature. Three four-lncRNA  
 16 signatures had the same highest accuracy (84.7%) for k=4 in the training set, which was also the  
 17 highest accuracy for all k=1,2,...,9. The three four-lncRNA signatures were:

18 *Signature4\_1*: ENST00000435885.1, XLOC\_013014, XLOC\_010016, and ENST00000547963.1

19 *Signature4\_2*: ENST00000435885.1, XLOC\_013014, XLOC\_011774, and ENST00000547963.1

20 *Signature4\_3*: ENST00000435885.1, XLOC\_010016, XLOC\_011774, and ENST00000547963.1

21

22 Only one three-lncRNA signature had the highest accuracy (81.9%) for k=3 in the training set,  
 23 which was:

24 *Signature3*: ENST00000435885.1, XLOC\_013014, and ENST00000547963.1

25

26 Two lncRNAs (ENST00000435885.1, ENST00000547963.1) were included in all the four-lncRNA  
 27 signatures and the three-lncRNA signature, and XLOC\_013014 were included in all these  
 28 signatures except *Signature4\_3*.

29

30 We explored the correlations between these signature related lncRNAs by calculating the  
 31 pearson and spearman's correlation coefficient in the training/test/independent sets, and the  
 32 results are shown below.

33 Training set (a: p value < 2.2e<sup>-16</sup>, others: p value > 0.05)

34

| Pearson's correlation coefficient | ENST00000435885.1 | XLOC_013014 | ENST00000547963.1 | XLOC_010016             | XLOC_011774             |
|-----------------------------------|-------------------|-------------|-------------------|-------------------------|-------------------------|
| ENST00000435885.1                 |                   | -0.03       | 0.09              | -0.04                   | -0.06                   |
| XLOC_013014                       |                   |             | -0.12             | <b>0.93<sup>a</sup></b> | <b>0.95<sup>a</sup></b> |
| ENST00000547963.1                 |                   |             |                   | -0.06                   | -0.07                   |
| XLOC_010016                       |                   |             |                   |                         | <b>0.95<sup>a</sup></b> |
| XLOC_011774                       |                   |             |                   |                         |                         |

| Spearman's correlation coefficient | ENST00000435885.1 | XLOC_013014 | ENST00000547963.1 | XLOC_010016             | XLOC_011774             |
|------------------------------------|-------------------|-------------|-------------------|-------------------------|-------------------------|
| ENST00000435885.1                  |                   | -0.06       | 0.08              | -0.12                   | -0.11                   |
| XLOC_013014                        |                   |             | -0.05             | <b>0.86<sup>a</sup></b> | <b>0.91<sup>a</sup></b> |
| ENST00000547963.1                  |                   |             |                   | 0.03                    | 0.04                    |
| XLOC_010016                        |                   |             |                   |                         | <b>0.92<sup>a</sup></b> |
| XLOC_011774                        |                   |             |                   |                         |                         |

1

2 Test set (a: p value < 2.2e<sup>-16</sup>, others: p value > 0.05)

| Pearson's correlation coefficient | ENST00000435885.1 | XLOC_013014 | ENST00000547963.1 | XLOC_010016             | XLOC_011774             |
|-----------------------------------|-------------------|-------------|-------------------|-------------------------|-------------------------|
| ENST00000435885.1                 |                   | -0.04       | 0.13              | -0.03                   | -0.04                   |
| XLOC_013014                       |                   |             | -0.09             | <b>0.91<sup>a</sup></b> | <b>0.97<sup>a</sup></b> |
| ENST00000547963.1                 |                   |             |                   | -0.17                   | -0.08                   |
| XLOC_010016                       |                   |             |                   |                         | <b>0.95<sup>a</sup></b> |
| XLOC_011774                       |                   |             |                   |                         |                         |

| Spearman's correlation coefficient | ENST00000435885.1 | XLOC_013014 | ENST00000547963.1 | XLOC_010016             | XLOC_011774             |
|------------------------------------|-------------------|-------------|-------------------|-------------------------|-------------------------|
| ENST00000435885.1                  |                   | 0.00        | 0.13              | 0.01                    | 0.00                    |
| XLOC_013014                        |                   |             | -0.09             | <b>0.92<sup>a</sup></b> | <b>0.96<sup>a</sup></b> |
| ENST00000547963.1                  |                   |             |                   | -0.16                   | -0.07                   |
| XLOC_010016                        |                   |             |                   |                         | <b>0.95<sup>a</sup></b> |
| XLOC_011774                        |                   |             |                   |                         |                         |

3

4

5 Independent set (a: p value < 2.2e<sup>-16</sup>, b: p value = 7.66e<sup>-3</sup>, c: p value = 3.22e<sup>-2</sup>, others: p value > 0.05)

6

| Pearson's correlation coefficient | ENST00000435885.1 | XLOC_013014 | ENST00000547963.1       | XLOC_010016             | XLOC_011774             |
|-----------------------------------|-------------------|-------------|-------------------------|-------------------------|-------------------------|
| ENST00000435885.1                 |                   | 0.08        | <b>0.34<sup>b</sup></b> | 0.00                    | 0.10                    |
| XLOC_013014                       |                   |             | 0.05                    | <b>0.90<sup>a</sup></b> | <b>0.99<sup>a</sup></b> |
| ENST00000547963.1                 |                   |             |                         | 0.06                    | 0.08                    |
| XLOC_010016                       |                   |             |                         |                         | <b>0.88<sup>a</sup></b> |
| XLOC_011774                       |                   |             |                         |                         |                         |

| Spearman's correlation coefficient | ENST00000435885.1 | XLOC_013014 | ENST00000547963.1       | XLOC_010016             | XLOC_011774             |
|------------------------------------|-------------------|-------------|-------------------------|-------------------------|-------------------------|
| ENST00000435885.1                  |                   | 0.15        | <b>0.28<sup>c</sup></b> | 0.00                    | 0.17                    |
| XLOC_013014                        |                   |             | 0.10                    | <b>0.89<sup>a</sup></b> | <b>0.99<sup>a</sup></b> |
| ENST00000547963.1                  |                   |             |                         | 0.09                    | 0.09                    |
| XLOC_010016                        |                   |             |                         |                         | <b>0.88<sup>a</sup></b> |
| XLOC_011774                        |                   |             |                         |                         |                         |

7

8

9 From the results, high level of positive correlation (pearson's and spearman's correlation  
10 coefficients of all pairs > 0.86, and p value < 2.2e<sup>-16</sup>) among the expression levels of XLOC\_013014,  
11 XLOC\_010016 and XLOC\_011774 were observed. So, there is one redundant lncRNA in each of  
12 the four-lncRNA signatures. But for the three-lncRNA signature, there is no redundant lncRNA.

13

14 **Comparison of prognostic performance between three-lncRNA and four-lncRNA signatures**

15 According to our algorithm, the patients could be classified into high- or low-risk groups by the  
16 signature. The following tables show the classification results of patients in  
17 training/test/independent sets by these signatures.

18 In the table, "1" denotes the patient is classified as low-risk and "2" denotes high-risk.

**Training set**

|     | Signature4_1 | Signature4_2 | Signature4_3 | Signature3 |  |     | Signature4_1 | Signature4_2 | Signature4_3 | Signature3 |
|-----|--------------|--------------|--------------|------------|--|-----|--------------|--------------|--------------|------------|
| p1  | 1            | 1            | 1            | 2          |  | p31 | 1            | 1            | 1            | 2          |
| p2  | 1            | 1            | 1            | 1          |  | p32 | 1            | 1            | 1            | 1          |
| p3  | 1            | 1            | 1            | 1          |  | p33 | 2            | 2            | 2            | 2          |
| p4  | 1            | 1            | 1            | 1          |  | p34 | 2            | 2            | 2            | 2          |
| p5  | 1            | 1            | 1            | 1          |  | p35 | 2            | 2            | 2            | 2          |
| p6  | 1            | 1            | 1            | 1          |  | p36 | 1            | 1            | 1            | 1          |
| p7  | 1            | 1            | 1            | 1          |  | p37 | 1            | 1            | 1            | 1          |
| p8  | 1            | 1            | 1            | 1          |  | p38 | 2            | 2            | 2            | 2          |
| p9  | 1            | 1            | 1            | 1          |  | p39 | 2            | 2            | 2            | 2          |
| p10 | 1            | 1            | 1            | 1          |  | p40 | 2            | 2            | 2            | 2          |
| p11 | 2            | 2            | 2            | 2          |  | p41 | 1            | 1            | 1            | 1          |
| p12 | 1            | 1            | 1            | 1          |  | p42 | 2            | 2            | 2            | 2          |
| p13 | 1            | 1            | 1            | 1          |  | p43 | 2            | 2            | 2            | 2          |
| p14 | 1            | 1            | 1            | 2          |  | p44 | 2            | 2            | 2            | 2          |
| p15 | 1            | 1            | 1            | 1          |  | p45 | 2            | 2            | 2            | 2          |
| p16 | 1            | 1            | 1            | 1          |  | p46 | 2            | 2            | 2            | 2          |
| p17 | 1            | 1            | 1            | 1          |  | p47 | 2            | 2            | 2            | 2          |
| p18 | 1            | 1            | 1            | 1          |  | p48 | 2            | 2            | 2            | 2          |
| p19 | 1            | 1            | 1            | 1          |  | p49 | 2            | 2            | 2            | 2          |
| p20 | 2            | 2            | 2            | 2          |  | p50 | 2            | 2            | 2            | 2          |
| p21 | 1            | 1            | 1            | 1          |  | p51 | 2            | 2            | 2            | 2          |
| p22 | 1            | 1            | 1            | 1          |  | p52 | 1            | 1            | 1            | 1          |
| p23 | 1            | 1            | 1            | 1          |  | p53 | 2            | 2            | 2            | 2          |
| p24 | 1            | 1            | 1            | 1          |  | p54 | 2            | 2            | 2            | 2          |
| p25 | 2            | 2            | 2            | 2          |  | p55 | 2            | 2            | 2            | 2          |
| p26 | 2            | 2            | 2            | 2          |  | p56 | 2            | 2            | 2            | 2          |
| p27 | 2            | 2            | 2            | 2          |  | p57 | 2            | 2            | 2            | 2          |
| p28 | 2            | 2            | 2            | 2          |  | p58 | 1            | 1            | 1            | 1          |
| p29 | 2            | 2            | 2            | 2          |  | p59 | 1            | 1            | 1            | 1          |
| p30 | 2            | 2            | 2            | 2          |  | p60 | 2            | 2            | 2            | 2          |

1

**Test set**

|     | Signature4_1 | Signature4_2 | Signature4_3 | Signature3 |  |     | Signature4_1 | Signature4_2 | Signature4_3 | Signature3 |
|-----|--------------|--------------|--------------|------------|--|-----|--------------|--------------|--------------|------------|
| p1  | 1            | 1            | 1            | 1          |  | p31 | 1            | 1            | 1            | 1          |
| p2  | 2            | 2            | 2            | 2          |  | p32 | 2            | 2            | 2            | 2          |
| p3  | 1            | 1            | 1            | 1          |  | p33 | 2            | 2            | 2            | 2          |
| p4  | 1            | 1            | 1            | 1          |  | p34 | 1            | 1            | 1            | 1          |
| p5  | 1            | 1            | 1            | 1          |  | p35 | 2            | 2            | 2            | 2          |
| p6  | 1            | 1            | 1            | 1          |  | p36 | 1            | 1            | 1            | 1          |
| p7  | 1            | 1            | 1            | 1          |  | p37 | 2            | 2            | 2            | 2          |
| p8  | 1            | 1            | 1            | 1          |  | p38 | 2            | 2            | 2            | 2          |
| p9  | 2            | 2            | 2            | 2          |  | p39 | 1            | 1            | 1            | 2          |
| p10 | 1            | 1            | 1            | 2          |  | p40 | 1            | 1            | 1            | 1          |
| p11 | 1            | 1            | 1            | 1          |  | p41 | 1            | 1            | 1            | 1          |
| p12 | 2            | 2            | 2            | 2          |  | p42 | 1            | 1            | 1            | 2          |
| p13 | 2            | 2            | 2            | 2          |  | p43 | 1            | 1            | 1            | 1          |
| p14 | 2            | 2            | 2            | 2          |  | p44 | 2            | 2            | 2            | 2          |
| p15 | 2            | 2            | 2            | 2          |  | p45 | 1            | 1            | 1            | 1          |
| p16 | 2            | 2            | 2            | 2          |  | p46 | 1            | 1            | 1            | 1          |
| p17 | 1            | 1            | 1            | 1          |  | p47 | 1            | 1            | 1            | 1          |
| p18 | 2            | 2            | 2            | 2          |  | p48 | 1            | 1            | 1            | 1          |
| p19 | 1            | 1            | 1            | 1          |  | p49 | 1            | 1            | 1            | 1          |
| p20 | 2            | 2            | 2            | 2          |  | p50 | 2            | 2            | 2            | 2          |
| p21 | 1            | 1            | 1            | 1          |  | p51 | 2            | 2            | 2            | 2          |
| p22 | 1            | 1            | 1            | 1          |  | p52 | 2            | 2            | 2            | 2          |
| p23 | 2            | 2            | 1            | 2          |  | p53 | 1            | 1            | 1            | 1          |
| p24 | 2            | 2            | 2            | 2          |  | p54 | 1            | 1            | 1            | 1          |
| p25 | 1            | 1            | 1            | 1          |  | p55 | 1            | 1            | 1            | 1          |
| p26 | 2            | 2            | 2            | 1          |  | p56 | 1            | 1            | 1            | 1          |
| p27 | 2            | 2            | 2            | 2          |  | p57 | 1            | 1            | 1            | 1          |
| p28 | 1            | 1            | 1            | 1          |  | p58 | 1            | 2            | 2            | 1          |
| p29 | 2            | 2            | 2            | 2          |  | p59 | 1            | 1            | 1            | 1          |
| p30 | 1            | 1            | 1            | 1          |  |     |              |              |              |            |

2

**Independent set**

|     | Signature4_1 | Signature4_2 | Signature4_3 | Signature3 |  |     | Signature4_1 | Signature4_2 | Signature4_3 | Signature3 |
|-----|--------------|--------------|--------------|------------|--|-----|--------------|--------------|--------------|------------|
| p1  | 2            | 2            | 2            | 2          |  | p31 | 2            | 2            | 2            | 2          |
| p2  | 2            | 2            | 2            | 2          |  | p32 | 2            | 2            | 2            | 2          |
| p3  | 2            | 2            | 2            | 1          |  | p33 | 2            | 2            | 2            | 2          |
| p4  | 2            | 2            | 2            | 2          |  | p34 | 2            | 2            | 2            | 1          |
| p5  | 2            | 2            | 2            | 2          |  | p35 | 2            | 1            | 2            | 2          |
| p6  | 1            | 1            | 1            | 1          |  | p36 | 1            | 1            | 1            | 1          |
| p7  | 1            | 1            | 1            | 1          |  | p37 | 1            | 1            | 1            | 1          |
| p8  | 2            | 2            | 2            | 2          |  | p38 | 1            | 1            | 1            | 1          |
| p9  | 1            | 1            | 1            | 1          |  | p39 | 2            | 2            | 2            | 1          |
| p10 | 2            | 2            | 2            | 2          |  | p40 | 2            | 2            | 2            | 2          |
| p11 | 1            | 1            | 1            | 1          |  | p41 | 2            | 2            | 2            | 2          |
| p12 | 1            | 1            | 1            | 1          |  | p42 | 1            | 1            | 1            | 1          |
| p13 | 1            | 1            | 1            | 1          |  | p43 | 2            | 2            | 2            | 2          |
| p14 | 1            | 1            | 1            | 1          |  | p44 | 1            | 1            | 1            | 1          |
| p15 | 2            | 2            | 2            | 2          |  | p45 | 2            | 2            | 2            | 2          |
| p16 | 1            | 1            | 1            | 1          |  | p46 | 2            | 2            | 2            | 2          |
| p17 | 1            | 1            | 1            | 1          |  | p47 | 2            | 2            | 2            | 2          |
| p18 | 1            | 1            | 1            | 1          |  | p48 | 2            | 2            | 2            | 2          |
| p19 | 2            | 2            | 2            | 2          |  | p49 | 2            | 1            | 2            | 2          |
| p20 | 2            | 2            | 2            | 2          |  | p50 | 2            | 2            | 2            | 2          |
| p21 | 2            | 2            | 2            | 1          |  | p51 | 2            | 2            | 2            | 2          |
| p22 | 2            | 2            | 2            | 2          |  | p52 | 2            | 2            | 2            | 2          |
| p23 | 2            | 2            | 2            | 2          |  | p53 | 2            | 2            | 2            | 2          |
| p24 | 2            | 2            | 2            | 2          |  | p54 | 2            | 2            | 2            | 2          |
| p25 | 1            | 1            | 1            | 1          |  | p55 | 1            | 1            | 1            | 1          |
| p26 | 2            | 1            | 2            | 2          |  | p56 | 2            | 2            | 2            | 2          |
| p27 | 1            | 1            | 2            | 2          |  | p57 | 1            | 1            | 1            | 1          |
| p28 | 1            | 1            | 1            | 1          |  | p58 | 2            | 2            | 2            | 2          |
| p29 | 2            | 2            | 2            | 2          |  | p59 | 2            | 2            | 2            | 2          |
| p30 | 2            | 2            | 2            | 2          |  | p60 | 2            | 2            | 2            | 2          |

1  
2  
3  
4  
5  
6  
7  
8  
9  
10  
11  
12  
13  
14  
15  
16  
17  
18  
19  
20  
21  
22  
23

From the tables, we see that the survival prediction results (high- or low-risk) of patients for the three four-lncRNA signatures were much the same. For the 60 patients of the training set, classification results of the three signatures were exactly the same. There were 1 (*Signature4\_2*) and 2 (*Signature4\_3*) patients with different classification compared to *Signature4\_1* for the 59 patients of the test set, and were 3 (*Signature4\_2*) and 1 (*Signature4\_3*) for the 60 patients of the independent set.

Because the classification results for the four-lncRNA signatures were much the same, we only summarized the comparison between *Signature4\_1* and the 3-lncRNA signature. From the tables, there were 3 patients with different classification compared to *Signature4\_1* for 60 patients of the training set. The number was 4 and 5 for 59 patients of the test set and 60 patients of the independent set, respectively. So the classification results were very similar between the three four-lncRNA signatures and the three-lncRNA signature.

**Prognostic performance comparison between three-lncRNA signature and four-lncRNA signatures**

As mentioned above, the survival prediction results (high- or low-risk) of the three four-lncRNA signatures were very similar. So, we only show the performance comparison between *Signature4\_1* and the three-lncRNA signature below. The prognostic performance of *Signature4\_2/Signature4\_3* and the three-lncRNA signature were also very similar (figure not shown).

Comparison of Kaplan-Meier survival curves of *Signature4\_1* and *Signature3*

Signature4\_1

Signature3

training set

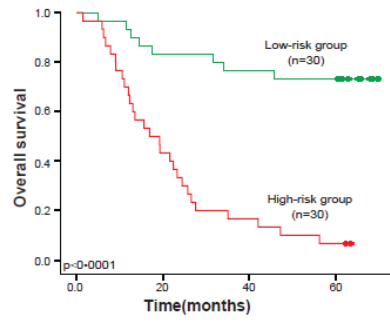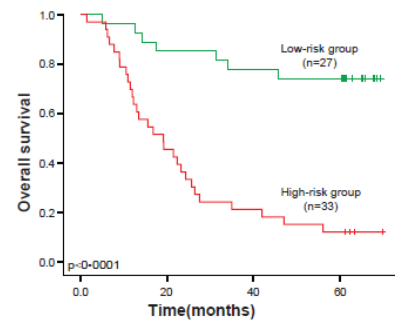

test set

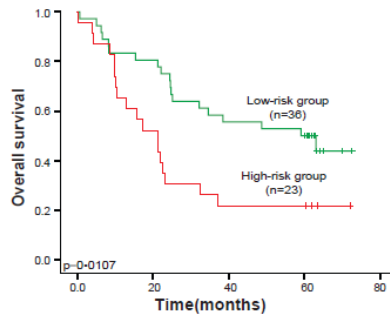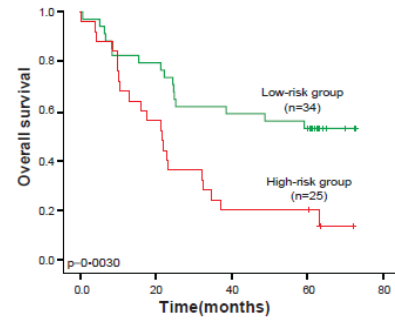

independent set

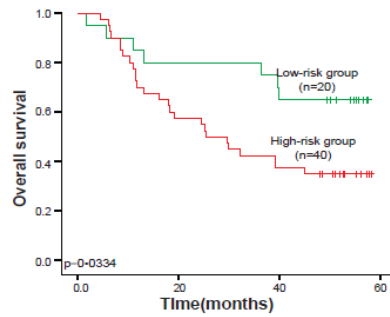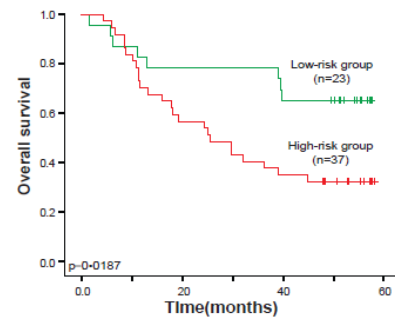

1

2

3

4

Comparison of Kaplan-Meier survival curves of *Signature4\_1* and *Signature3* within clinical stages

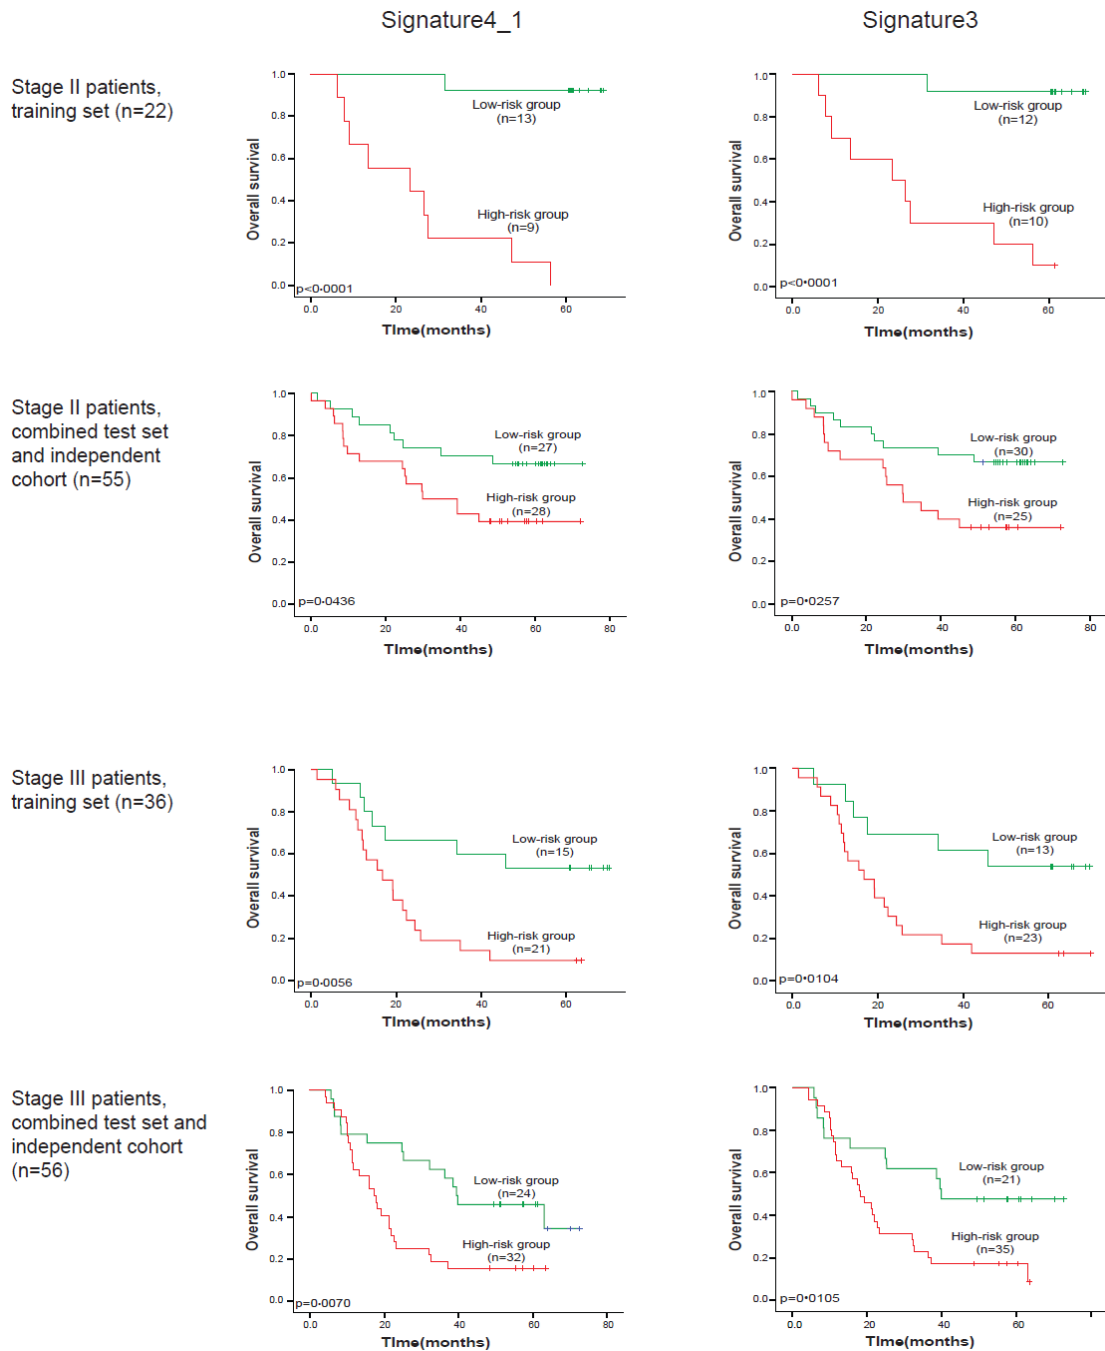

1  
2

3 From these results, we see that the performances between the four-lncRNA signature and  
 4 three-lncRNA signature are very similar. The p values of Log-rank tests show that both the  
 5 four-lncRNA signature and the three-lncRNA signature are able to predict the survival of patients  
 6 both all together and within TNM stages and that four-lncRNA signature does not improve  
 7 prognostic power compared with three-lncRNA signature.
