# Supplementary material for: LncRNA profile study reveals a three-lncRNA signature associated with the survival of patients with oesophageal squamous cell carcinoma
Source: HighWire-hosted journal article supplement (doi:10.1136/gutjnl-2013-305806), 2014-02-12

**Supplementary Figure 1.** Patient enrollment procedure diagram of the original (left) and independent (right) cohorts

**Supplementary Figure 2.** Comparison of lncRNA expression value measured by microarray and qRT-PCR.

The expression value of the three signature lncRNAs were measured by qRT-PCR and compared with microarray results in 25 randomly selected tumor samples. The quantitative RT-PCR reactions were performed in triplicate and the mean values of the lncRNAs were used. The expression levels of the 25 samples by microarray and qRT-PCR were shown for each lncRNA. For comparison, the expression value measured by both microarray and RT-PCR were normalized by z-score, shown as the longitudinal axis.

Supplementary Figures

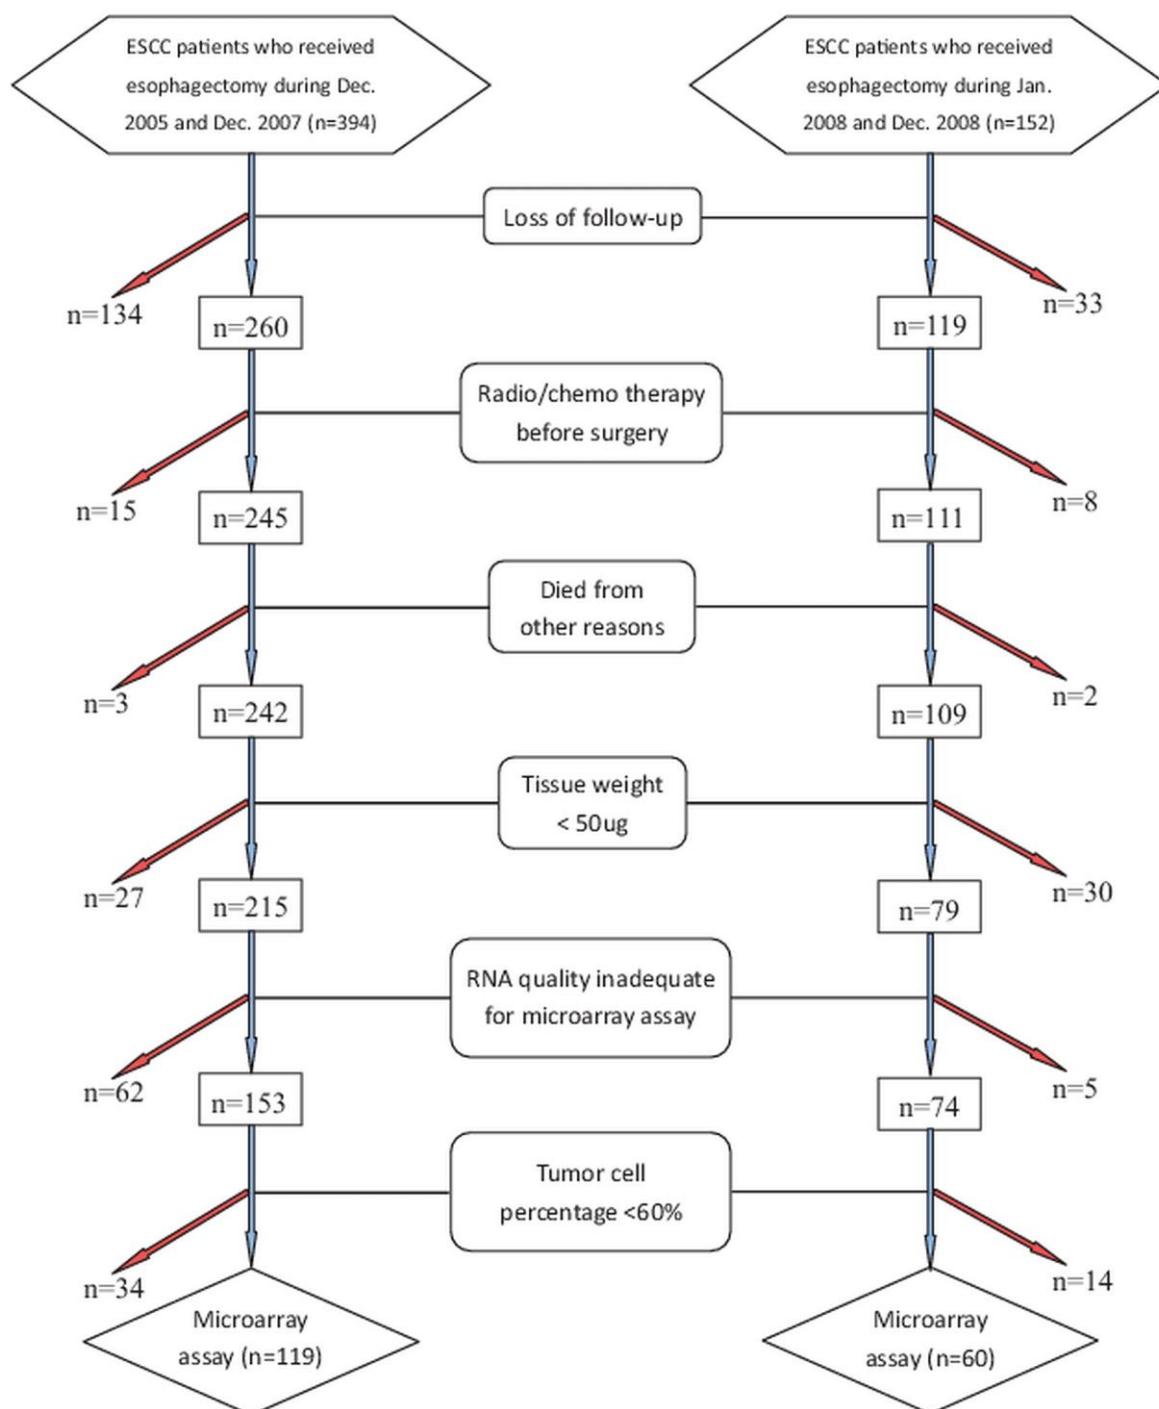

ENST00000435885.1

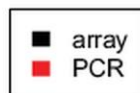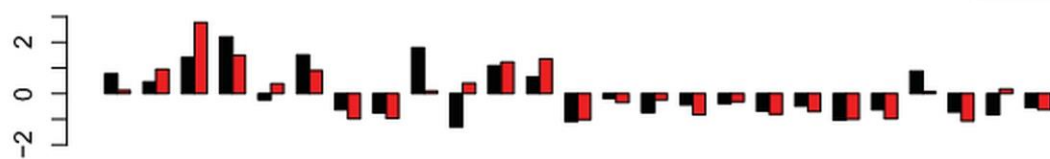

XLOC\_013014

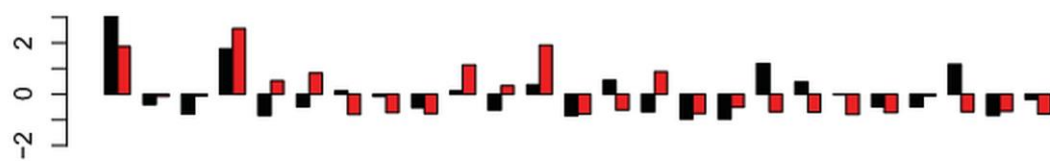

ENST00000547963.1

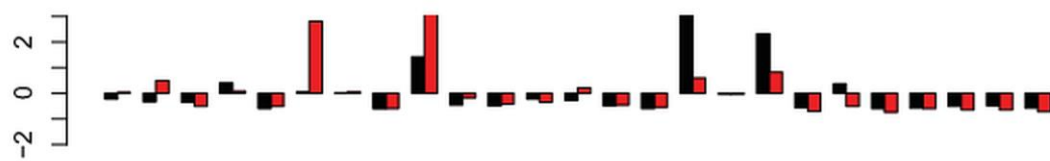

Supplement: gutjnl-2013-305806supp_figure.pdf [file gutjnl-2013-305806supp_figure.pdf]
