# Supplementary material for: LncRNA profile study reveals a three-lncRNA signature associated with the survival of patients with oesophageal squamous cell carcinoma
Source: HighWire-hosted journal article supplement (doi:10.1136/gutjnl-2013-305806), 2014-02-12
Supplement: gutjnl-2013-305806supp_table2.pdf [file gutjnl-2013-305806supp_table2.pdf]

---

**Supplementary Table 2: primers used in this work**

---

|                     |                       |
|---------------------|-----------------------|
| ENST00000435885.1_F | tcttcctcactgccctgtt   |
| ENST00000435885.1_R | ggaggaacgccttactgcat  |
| XLOC_013014_F       | cctcataagccctggaactaa |
| XLOC_013014_R       | gccttataggacctgtgaaat |
| ENST00000547963.1_F | tgagaactctgccctgtga   |
| ENST00000547963.1_R | gccggaagtccaatagcaag  |

---
