# Supplementary material for: LncRNA profile study reveals a three-lncRNA signature associated with the survival of patients with oesophageal squamous cell carcinoma
Source: HighWire-hosted journal article supplement (doi:10.1136/gutjnl-2013-305806), 2014-02-12
Supplement: gutjnl-2013-305806supp_table3.pdf [file gutjnl-2013-305806supp_table3.pdf]

**Supplementary Table 3:** Results of univariable and multivariable Cox regression analysis of the lncRNA signature and survival in the training set (n=60) and in the combined test and independent cohort (n=119) of ten imputations

|                                  |                         | Imputation 1          |         |                        |         |
|----------------------------------|-------------------------|-----------------------|---------|------------------------|---------|
|                                  |                         | Univariable analysis  |         | Multivariable analysis |         |
|                                  |                         | Hazard ratio (95% CI) | P       | Hazard ratio (95% CI)  | P       |
| <b>Training set</b>              |                         |                       |         |                        |         |
| Age                              |                         | 1•595 (0•821-3•098)   | 0•1680  | 2•366 (1•191-4•701)    | 0•0140  |
| Gender                           |                         | 1•233 (0•561-2•707)   | 0•6022  |                        |         |
| Tobacco use                      | >60/≤60                 | 0•693 (0•357-1•346)   | 0•2790  |                        |         |
| Alcohol use                      | Female/Male             | 0•896 (0•464-1•732)   | 0•7445  |                        |         |
| Tumor location                   | Upper, middle/lower     | 1•249 (0•602-2•591)   | 0•5504  |                        |         |
| Tumor grade                      | moderately, poorly/Well | 1•569 (0•685-3•592)   | 0•2863  |                        |         |
| T                                | T3, T4/T1, T2           | 0•767 (0•319-1•845)   | 0•5540  |                        |         |
| N                                | N1, N2, N3/N0           | 1•960 (0•974-3•943)   | 0•0592  |                        |         |
| TNM                              | III/I, II               | 2•506 (1•202-5•226)   | 0•0143  |                        |         |
| Pneumonia                        | Y/N                     | 1•050 (0•144-7•672)   | 0•9614  |                        |         |
| Anastomotic leak                 | Y/N                     | 2•716 (0•829-8•892)   | 0•0987  | 5•805 (1•605-21•000)   | 0•0073  |
| Arrhythmia                       | Y/N                     | 1•416 (0•706-2•837)   | 0•3271  |                        |         |
| Adjuvant therapy                 | Y/N                     | 1•501 (0•849-2•652)   | 0•1625  |                        |         |
| lncRNA signature                 | High risk/low risk      | 6•578 (2•837-15•252)  | <0•0001 | 8•486 (3•550-20•284)   | <0•0001 |
| <b>Test + independent cohort</b> |                         |                       |         |                        |         |
| Age                              | >60/≤60                 | 1•724 (1•072-2•774)   | 0•0246  |                        |         |
| Gender                           | Female/Male             | 1•283 (0•714-2•306)   | 0•4045  |                        |         |
| Tobacco use                      | Y/N                     | 0•788 (0•488-1•272)   | 0•3295  |                        |         |
| Alcohol use                      | Y/N                     | 0•866 (0•539-1•390)   | 0•5501  |                        |         |
| Tumor location                   | Upper, middle/lower     | 1•184 (0•719-1•951)   | 0•5065  |                        |         |
| Tumor grade                      | moderately, poorly/Well | 0•982 (0•502-1•919)   | 0•9571  |                        |         |
| T                                | T3, T4/T1, T2           | 1•237 (0•716-2•183)   | 0•4458  |                        |         |
| N                                | N1, N2, N3/N0           | 2•214 (1•346-3•640)   | 0•0017  | 1•933 (1•165-3•205)    | 0•0107  |
| TNM                              | III/I, II               | 2•031 (1•258-3•278)   | 0•0037  |                        |         |
| Pneumonia                        | Y/N                     | 1•507 (0•721-3•152)   | 0•2759  |                        |         |
| Anastomotic leak                 | Y/N                     | 0•942 (0•343-2•589)   | 0•9085  |                        |         |
| Arrhythmia                       | Y/N                     | 0•976 (0•558-1•705)   | 0•9311  |                        |         |
| Adjuvant therapy                 | Y/N                     | 2•130 (1•212-3•744)   | 0•0086  |                        |         |
| lncRNA signature                 | High risk/low risk      | 2•412 (1•464-3•975)   | 0•0005  | 2•144 (1•291-3•562)    | 0•0032  |

**Supplementary Table 3:** Results of univariable and multivariable Cox regression analysis of the lncRNA signature and survival in the training set (n=60) and in the combined test and independent cohort (n=119) of ten imputations (Con't)

|                                  |                         | Imputation 2          |         |                        |         |
|----------------------------------|-------------------------|-----------------------|---------|------------------------|---------|
|                                  |                         | Univariable analysis  |         | Multivariable analysis |         |
|                                  |                         | Hazard ratio (95% CI) | P       | Hazard ratio (95% CI)  | P       |
| <b>Training set</b>              |                         |                       |         |                        |         |
| Age                              | >60/≤60                 | 1•595 (0•821-3•098)   | 0•1680  | 3•766 (1•739-8•159)    | 0•0008  |
| Gender                           | Female/Male             | 1•233 (0•561-2•707)   | 0•6022  |                        |         |
| Tobacco use                      | Y/N                     | 0•693 (0•357-1•346)   | 0•2790  |                        |         |
| Alcohol use                      | Y/N                     | 0•896 (0•464-1•732)   | 0•7445  |                        |         |
| Tumor location                   | Upper, middle/lower     | 1•249 (0•602-2•591)   | 0•5504  |                        |         |
| Tumor grade                      | moderately, poorly/Well | 1•569 (0•685-3•592)   | 0•2863  |                        |         |
| T                                | T3, T4/T1, T2           | 0•767 (0•319-1•845)   | 0•5540  |                        |         |
| N                                | N1, N2, N3/N0           | 1•960 (0•974-3•943)   | 0•0592  |                        |         |
| TNM                              | III/I, II               | 2•506 (1•202-5•226)   | 0•0143  |                        |         |
| Pneumonia                        | Y/N                     | 1•050 (0•144-7•672)   | 0•9614  |                        |         |
| Anastomotic leak                 | Y/N                     | 2•716 (0•829-8•892)   | 0•0987  | 4•670 (1•239-17•602)   | 0•0073  |
| Arrhythmia                       | Y/N                     | 1•416 (0•706-2•837)   | 0•3271  |                        |         |
| Adjuvant therapy                 | Y/N                     | 2•364 (1•073-5•209)   | 0•0327  | 3•624 (1•491-8•810)    | 0•0045  |
| lncRNA signature                 | High risk/low risk      | 6•578 (2•837-15•252)  | <0•0001 | 10•744 (4•300-26•845)  | <0•0001 |
| <b>Test + independent cohort</b> |                         |                       |         |                        |         |
| Age                              | >60/≤60                 | 1•724 (1•072-2•774)   | 0•0246  | 1•884 (1•139-3•117)    | 0•0136  |
| Gender                           | Female/Male             | 1•283 (0•714-2•306)   | 0•4045  |                        |         |
| Tobacco use                      | Y/N                     | 0•788 (0•488-1•272)   | 0•3295  |                        |         |
| Alcohol use                      | Y/N                     | 0•866 (0•539-1•390)   | 0•5501  |                        |         |
| Tumor location                   | Upper, middle/lower     | 1•184 (0•719-1•951)   | 0•5065  | 1•759 (1•022-3•026)    | 0•0414  |
| Tumor grade                      | moderately, poorly/Well | 0•982 (0•502-1•919)   | 0•9571  |                        |         |
| T                                | T3, T4/T1, T2           | 1•237 (0•716-2•183)   | 0•4458  |                        |         |
| N                                | N1, N2, N3/N0           | 2•214 (1•346-3•640)   | 0•0017  | 1•639 (0•923-2•912)    | 0•0920  |
| TNM                              | III/I, II               | 2•031 (1•258-3•278)   | 0•0037  |                        |         |
| Pneumonia                        | Y/N                     | 1•507 (0•721-3•152)   | 0•2759  |                        |         |
| Anastomotic leak                 | Y/N                     | 0•942 (0•343-2•589)   | 0•9085  |                        |         |
| Arrhythmia                       | Y/N                     | 0•976 (0•558-1•705)   | 0•9311  |                        |         |
| Adjuvant therapy                 | Y/N                     | 2•351 (1•309-4•223)   | 0•0042  | 2•443 (1•185-5•038)    | 0•0156  |
| lncRNA signature                 | High risk/low risk      | 2•412 (1•464-3•975)   | 0•0005  | 1•961 (1•165-3•299)    | 0•0112  |

**Supplementary Table 3:** Results of univariable and multivariable Cox regression analysis of the lncRNA signature and survival in the training set (n=60) and in the combined test and independent cohort (n=119) of ten imputations (Con't)

|                                  |                         | Imputation 3          |         |                        |         |
|----------------------------------|-------------------------|-----------------------|---------|------------------------|---------|
|                                  |                         | Univariable analysis  |         | Multivariable analysis |         |
|                                  |                         | Hazard ratio (95% CI) | P       | Hazard ratio (95% CI)  | P       |
| <b>Training set</b>              |                         |                       |         |                        |         |
| Age                              | >60/≤60                 | 1•595 (0•821-3•098)   | 0•1680  | 2•717 (1•320-5•593)    | 0•0067  |
| Gender                           | Female/Male             | 1•233 (0•561-2•707)   | 0•6022  |                        |         |
| Tobacco use                      | Y/N                     | 0•693 (0•357-1•346)   | 0•2790  |                        |         |
| Alcohol use                      | Y/N                     | 0•896 (0•464-1•732)   | 0•7445  |                        |         |
| Tumor location                   | Upper, middle/lower     | 1•249 (0•602-2•591)   | 0•5504  |                        |         |
| Tumor grade                      | moderately, poorly/Well | 1•569 (0•685-3•592)   | 0•2863  |                        |         |
| T                                | T3, T4/T1, T2           | 0•767 (0•319-1•845)   | 0•5540  |                        |         |
| N                                | N1, N2, N3/N0           | 1•960 (0•974-3•943)   | 0•0592  |                        |         |
| TNM                              | III/I, II               | 2•506 (1•202-5•226)   | 0•0143  | 2•054 (0•975-4•327)    | 0•0583  |
| Pneumonia                        | Y/N                     | 1•050 (0•144-7•672)   | 0•9614  |                        |         |
| Anastomotic leak                 | Y/N                     | 2•716 (0•829-8•892)   | 0•0987  |                        |         |
| Arrhythmia                       | Y/N                     | 1•416 (0•706-2•837)   | 0•3271  |                        |         |
| Adjuvant therapy                 | Y/N                     | 2•389 (1•167-4•890)   | 0•0172  | 2•789 (1•355-5•740)    | 0•0053  |
| lncRNA signature                 | High risk/low risk      | 6•578 (2•837-15•252)  | <0•0001 | 8•178 (3•322-20•132)   | <0•0001 |
| <b>Test + independent cohort</b> |                         |                       |         |                        |         |
| Age                              | >60/≤60                 | 1•724 (1•072-2•774)   | 0•0246  | 1•883 (1•142-3•104)    | 0•0131  |
| Gender                           | Female/Male             | 1•283 (0•714-2•306)   | 0•4045  |                        |         |
| Tobacco use                      | Y/N                     | 0•788 (0•488-1•272)   | 0•3295  |                        |         |
| Alcohol use                      | Y/N                     | 0•866 (0•539-1•390)   | 0•5501  |                        |         |
| Tumor location                   | Upper, middle/lower     | 1•184 (0•719-1•951)   | 0•5065  | 1•611 (0•951-2•730)    | 0•0760  |
| Tumor grade                      | moderately, poorly/Well | 0•982 (0•502-1•919)   | 0•9571  |                        |         |
| T                                | T3, T4/T1, T2           | 1•237 (0•716-2•183)   | 0•4458  |                        |         |
| N                                | N1, N2, N3/N0           | 2•214 (1•346-3•640)   | 0•0017  |                        |         |
| TNM                              | III/I, II               | 2•031 (1•258-3•278)   | 0•0037  |                        |         |
| Pneumonia                        | Y/N                     | 1•507 (0•721-3•152)   | 0•2759  |                        |         |
| Anastomotic leak                 | Y/N                     | 0•942 (0•343-2•589)   | 0•9085  |                        |         |
| Arrhythmia                       | Y/N                     | 0•976 (0•558-1•705)   | 0•9311  |                        |         |
| Adjuvant therapy                 | Y/N                     | 2•643 (1•439-4•854)   | 0•0017  | 3•009 (1•584-5•718)    | 0•0008  |
| lncRNA signature                 | High risk/low risk      | 2•412 (1•464-3•975)   | 0•0005  | 2•048 (1•231-3•406)    | 0•0058  |

**Supplementary Table 3:** Results of univariable and multivariable Cox regression analysis of the lncRNA signature and survival in the training set (n=60) and in the combined test and independent cohort (n=119) of ten imputations (Con't)

|                                  |                         | Imputation 4          |         |                        |         |
|----------------------------------|-------------------------|-----------------------|---------|------------------------|---------|
|                                  |                         | Univariable analysis  |         | Multivariable analysis |         |
|                                  |                         | Hazard ratio (95% CI) | P       | Hazard ratio (95% CI)  | P       |
| <b>Training set</b>              |                         |                       |         |                        |         |
| Age                              | >60/≤60                 | 1•595 (0•821-3•098)   | 0•1680  | 2•366 (1•191-4•701)    | 0•0140  |
| Gender                           | Female/Male             | 1•233 (0•561-2•707)   | 0•6022  |                        |         |
| Tobacco use                      | Y/N                     | 0•693 (0•357-1•346)   | 0•2790  |                        |         |
| Alcohol use                      | Y/N                     | 0•896 (0•464-1•732)   | 0•7445  |                        |         |
| Tumor location                   | Upper, middle/lower     | 1•249 (0•602-2•591)   | 0•5504  |                        |         |
| Tumor grade                      | moderately, poorly/Well | 1•569 (0•685-3•592)   | 0•2863  |                        |         |
| T                                | T3, T4/T1, T2           | 0•767 (0•319-1•845)   | 0•5540  |                        |         |
| N                                | N1, N2, N3/N0           | 1•960 (0•974-3•943)   | 0•0592  |                        |         |
| TNM                              | III/I, II               | 2•506 (1•202-5•226)   | 0•0143  |                        |         |
| Pneumonia                        | Y/N                     | 1•050 (0•144-7•672)   | 0•9614  |                        |         |
| Anastomotic leak                 | Y/N                     | 2•716 (0•829-8•892)   | 0•0987  | 5•805 (1•605-21•000)   | 0•0073  |
| Arrhythmia                       | Y/N                     | 1•416 (0•706-2•837)   | 0•3271  |                        |         |
| Adjuvant therapy                 | Y/N                     | 1•691 (0•864-3•311)   | 0•1253  |                        |         |
| lncRNA signature                 | High risk/low risk      | 6•578 (2•837-15•252)  | <0•0001 | 8•486 (3•550-20•284)   | <0•0001 |
| <b>Test + independent cohort</b> |                         |                       |         |                        |         |
| Age                              | >60/≤60                 | 1•724 (1•072-2•774)   | 0•0246  | 1•679 (1•035-2•725)    | 0•0359  |
| Gender                           | Female/Male             | 1•283 (0•714-2•306)   | 0•4045  |                        |         |
| Tobacco use                      | Y/N                     | 0•788 (0•488-1•272)   | 0•3295  |                        |         |
| Alcohol use                      | Y/N                     | 0•866 (0•539-1•390)   | 0•5501  |                        |         |
| Tumor location                   | Upper, middle/lower     | 1•184 (0•719-1•951)   | 0•5065  |                        |         |
| Tumor grade                      | moderately, poorly/Well | 0•982 (0•502-1•919)   | 0•9571  |                        |         |
| T                                | T3, T4/T1, T2           | 1•237 (0•716-2•183)   | 0•4458  |                        |         |
| N                                | N1, N2, N3/N0           | 2•214 (1•346-3•640)   | 0•0017  |                        |         |
| TNM                              | III/I, II               | 2•031 (1•258-3•278)   | 0•0037  |                        |         |
| Pneumonia                        | Y/N                     | 1•507 (0•721-3•152)   | 0•2759  |                        |         |
| Anastomotic leak                 | Y/N                     | 0•942 (0•343-2•589)   | 0•9085  |                        |         |
| Arrhythmia                       | Y/N                     | 0•976 (0•558-1•705)   | 0•9311  |                        |         |
| Adjuvant therapy                 | Y/N                     | 2•567 (1•369-4•814)   | 0•0033  | 2•451 (1•294-4•641)    | 0•0059  |
| lncRNA signature                 | High risk/low risk      | 2•412 (1•464-3•975)   | 0•0005  | 1•978 (1•188-3•293)    | 0•0087  |

**Supplementary Table 3:** Results of univariable and multivariable Cox regression analysis of the lncRNA signature and survival in the training set (n=60) and in the combined test and independent cohort (n=119) of ten imputations (Con't)

|                                  |                         | Imputation 5          |         |                        |         |
|----------------------------------|-------------------------|-----------------------|---------|------------------------|---------|
|                                  |                         | Univariable analysis  |         | Multivariable analysis |         |
|                                  |                         | Hazard ratio (95% CI) | P       | Hazard ratio (95% CI)  | P       |
| <b>Training set</b>              |                         |                       |         |                        |         |
| Age                              | >60/≤60                 | 1•595 (0•821-3•098)   | 0•1680  | 2•366 (1•191-4•701)    | 0•0140  |
| Gender                           | Female/Male             | 1•233 (0•561-2•707)   | 0•6022  |                        |         |
| Tobacco use                      | Y/N                     | 0•693 (0•357-1•346)   | 0•2790  |                        |         |
| Alcohol use                      | Y/N                     | 0•896 (0•464-1•732)   | 0•7445  |                        |         |
| Tumor location                   | Upper, middle/lower     | 1•249 (0•602-2•591)   | 0•5504  |                        |         |
| Tumor grade                      | moderately, poorly/Well | 1•569 (0•685-3•592)   | 0•2863  |                        |         |
| T                                | T3, T4/T1, T2           | 0•767 (0•319-1•845)   | 0•5540  |                        |         |
| N                                | N1, N2, N3/N0           | 1•960 (0•974-3•943)   | 0•0592  |                        |         |
| TNM                              | III/I, II               | 2•506 (1•202-5•226)   | 0•0143  |                        |         |
| Pneumonia                        | Y/N                     | 1•050 (0•144-7•672)   | 0•9614  |                        |         |
| Anastomotic leak                 | Y/N                     | 2•716 (0•829-8•892)   | 0•0987  | 5•805 (1•605-21•000)   | 0•0073  |
| Arrhythmia                       | Y/N                     | 1•416 (0•706-2•837)   | 0•3271  |                        |         |
| Adjuvant therapy                 | Y/N                     | 1•922 (0•886-4•167)   | 0•0981  |                        |         |
| lncRNA signature                 | High risk/low risk      | 6•578 (2•837-15•252)  | <0•0001 | 8•486 (3•550-20•284)   | <0•0001 |
| <b>Test + independent cohort</b> |                         |                       |         |                        |         |
| Age                              | >60/≤60                 | 1•724 (1•072-2•774)   | 0•0246  |                        |         |
| Gender                           | Female/Male             | 1•283 (0•714-2•306)   | 0•4045  |                        |         |
| Tobacco use                      | Y/N                     | 0•788 (0•488-1•272)   | 0•3295  |                        |         |
| Alcohol use                      | Y/N                     | 0•866 (0•539-1•390)   | 0•5501  |                        |         |
| Tumor location                   | Upper, middle/lower     | 1•184 (0•719-1•951)   | 0•5065  |                        |         |
| Tumor grade                      | moderately, poorly/Well | 0•982 (0•502-1•919)   | 0•9571  |                        |         |
| T                                | T3, T4/T1, T2           | 1•237 (0•716-2•183)   | 0•4458  |                        |         |
| N                                | N1, N2, N3/N0           | 2•214 (1•346-3•640)   | 0•0017  | 1•933 (1•165-3•205)    | 0•0107  |
| TNM                              | III/I, II               | 2•031 (1•258-3•278)   | 0•0037  |                        |         |
| Pneumonia                        | Y/N                     | 1•507 (0•721-3•152)   | 0•2759  |                        |         |
| Anastomotic leak                 | Y/N                     | 0•942 (0•343-2•589)   | 0•9085  |                        |         |
| Arrhythmia                       | Y/N                     | 0•976 (0•558-1•705)   | 0•9311  |                        |         |
| Adjuvant therapy                 | Y/N                     | 2•439 (1•316-4•520)   | 0•0046  |                        |         |
| lncRNA signature                 | High risk/low risk      | 2•412 (1•464-3•975)   | 0•0005  | 2•144 (1•291-3•562)    | 0•0032  |

**Supplementary Table 3:** Results of univariable and multivariable Cox regression analysis of the lncRNA signature and survival in the training set (n=60) and in the combined test and independent cohort (n=119) of ten imputations (Con't)

|                                  |                         | Imputation 6          |         |                        |         |
|----------------------------------|-------------------------|-----------------------|---------|------------------------|---------|
|                                  |                         | Univariable analysis  |         | Multivariable analysis |         |
|                                  |                         | Hazard ratio (95% CI) | P       | Hazard ratio (95% CI)  | P       |
| <b>Training set</b>              |                         |                       |         |                        |         |
| Age                              | >60/≤60                 | 1•595 (0•821-3•098)   | 0•1680  | 2•366 (1•191-4•701)    | 0•0140  |
| Gender                           | Female/Male             | 1•233 (0•561-2•707)   | 0•6022  |                        |         |
| Tobacco use                      | Y/N                     | 0•693 (0•357-1•346)   | 0•2790  |                        |         |
| Alcohol use                      | Y/N                     | 0•896 (0•464-1•732)   | 0•7445  |                        |         |
| Tumor location                   | Upper, middle/lower     | 1•249 (0•602-2•591)   | 0•5504  |                        |         |
| Tumor grade                      | moderately, poorly/Well | 1•569 (0•685-3•592)   | 0•2863  |                        |         |
| T                                | T3, T4/T1, T2           | 0•767 (0•319-1•845)   | 0•5540  |                        |         |
| N                                | N1, N2, N3/N0           | 1•960 (0•974-3•943)   | 0•0592  |                        |         |
| TNM                              | III/I, II               | 2•506 (1•202-5•226)   | 0•0143  |                        |         |
| Pneumonia                        | Y/N                     | 1•050 (0•144-7•672)   | 0•9614  |                        |         |
| Anastomotic leak                 | Y/N                     | 2•716 (0•829-8•892)   | 0•0987  | 5•805 (1•605-21•000)   | 0•0073  |
| Arrhythmia                       | Y/N                     | 1•416 (0•706-2•837)   | 0•3271  |                        |         |
| Adjuvant therapy                 | Y/N                     | 1•234 (0•705-2•158)   | 0•4619  |                        |         |
| lncRNA signature                 | High risk/low risk      | 6•578 (2•837-15•252)  | <0•0001 | 8•486 (3•550-20•284)   | <0•0001 |
| <b>Test + independent cohort</b> |                         |                       |         |                        |         |
| Age                              | >60/≤60                 | 1•724 (1•072-2•774)   | 0•0246  | 1•674 (1•033-2•713)    | 0•0365  |
| Gender                           | Female/Male             | 1•283 (0•714-2•306)   | 0•4045  |                        |         |
| Tobacco use                      | Y/N                     | 0•788 (0•488-1•272)   | 0•3295  |                        |         |
| Alcohol use                      | Y/N                     | 0•866 (0•539-1•390)   | 0•5501  |                        |         |
| Tumor location                   | Upper, middle/lower     | 1•184 (0•719-1•951)   | 0•5065  |                        |         |
| Tumor grade                      | moderately, poorly/Well | 0•982 (0•502-1•919)   | 0•9571  |                        |         |
| T                                | T3, T4/T1, T2           | 1•237 (0•716-2•183)   | 0•4458  |                        |         |
| N                                | N1, N2, N3/N0           | 2•214 (1•346-3•640)   | 0•0017  |                        |         |
| TNM                              | III/I, II               | 2•031 (1•258-3•278)   | 0•0037  |                        |         |
| Pneumonia                        | Y/N                     | 1•507 (0•721-3•152)   | 0•2759  |                        |         |
| Anastomotic leak                 | Y/N                     | 0•942 (0•343-2•589)   | 0•9085  |                        |         |
| Arrhythmia                       | Y/N                     | 0•976 (0•558-1•705)   | 0•9311  |                        |         |
| Adjuvant therapy                 | Y/N                     | 2•227 (1•241-3•997)   | 0•0073  | 2•328 (1•299-4•172)    | 0•0045  |
| lncRNA signature                 | High risk/low risk      | 2•412 (1•464-3•975)   | 0•0005  | 2•203 (1•330-3•649)    | 0•0022  |

**Supplementary Table 3:** Results of univariable and multivariable Cox regression analysis of the lncRNA signature and survival in the training set (n=60) and in the combined test and independent cohort (n=119) of ten imputations (Con't)

|                                  |                         | Imputation 7          |         |                        |         |
|----------------------------------|-------------------------|-----------------------|---------|------------------------|---------|
|                                  |                         | Univariable analysis  |         | Multivariable analysis |         |
|                                  |                         | Hazard ratio (95% CI) | P       | Hazard ratio (95% CI)  | P       |
| <b>Training set</b>              |                         |                       |         |                        |         |
| Age                              | >60/≤60                 | 1•595 (0•821-3•098)   | 0•1680  | 2•366 (1•191-4•701)    | 0•0140  |
| Gender                           | Female/Male             | 1•233 (0•561-2•707)   | 0•6022  |                        |         |
| Tobacco use                      | Y/N                     | 0•693 (0•357-1•346)   | 0•2790  |                        |         |
| Alcohol use                      | Y/N                     | 0•896 (0•464-1•732)   | 0•7445  |                        |         |
| Tumor location                   | Upper, middle/lower     | 1•249 (0•602-2•591)   | 0•5504  |                        |         |
| Tumor grade                      | moderately, poorly/Well | 1•569 (0•685-3•592)   | 0•2863  |                        |         |
| T                                | T3, T4/T1, T2           | 0•767 (0•319-1•845)   | 0•5540  |                        |         |
| N                                | N1, N2, N3/N0           | 1•960 (0•974-3•943)   | 0•0592  |                        |         |
| TNM                              | III/I, II               | 2•506 (1•202-5•226)   | 0•0143  |                        |         |
| Pneumonia                        | Y/N                     | 1•050 (0•144-7•672)   | 0•9614  |                        |         |
| Anastomotic leak                 | Y/N                     | 2•716 (0•829-8•892)   | 0•0987  | 5•805 (1•605-21•000)   | 0•0073  |
| Arrhythmia                       | Y/N                     | 1•416 (0•706-2•837)   | 0•3271  |                        |         |
| Adjuvant therapy                 | Y/N                     | 1•581 (0•728-3•436)   | 0•2471  |                        |         |
| lncRNA signature                 | High risk/low risk      | 6•578 (2•837-15•252)  | <0•0001 | 8•486 (3•550-20•284)   | <0•0001 |
| <b>Test + independent cohort</b> |                         |                       |         |                        |         |
| Age                              | >60/≤60                 | 1•724 (1•072-2•774)   | 0•0246  | 1•700 (1•044-2•769)    | 0•0329  |
| Gender                           | Female/Male             | 1•283 (0•714-2•306)   | 0•4045  |                        |         |
| Tobacco use                      | Y/N                     | 0•788 (0•488-1•272)   | 0•3295  |                        |         |
| Alcohol use                      | Y/N                     | 0•866 (0•539-1•390)   | 0•5501  |                        |         |
| Tumor location                   | Upper, middle/lower     | 1•184 (0•719-1•951)   | 0•5065  |                        |         |
| Tumor grade                      | moderately, poorly/Well | 0•982 (0•502-1•919)   | 0•9571  |                        |         |
| T                                | T3, T4/T1, T2           | 1•237 (0•716-2•183)   | 0•4458  |                        |         |
| N                                | N1, N2, N3/N0           | 2•214 (1•346-3•640)   | 0•0017  |                        |         |
| TNM                              | III/I, II               | 2•031 (1•258-3•278)   | 0•0037  |                        |         |
| Pneumonia                        | Y/N                     | 1•507 (0•721-3•152)   | 0•2759  |                        |         |
| Anastomotic leak                 | Y/N                     | 0•942 (0•343-2•589)   | 0•9085  |                        |         |
| Arrhythmia                       | Y/N                     | 0•976 (0•558-1•705)   | 0•9311  |                        |         |
| Adjuvant therapy                 | Y/N                     | 2•217 (1•296-3•791)   | 0•0036  | 2•312 (1•313-4•071)    | 0•0037  |
| lncRNA signature                 | High risk/low risk      | 2•412 (1•464-3•975)   | 0•0005  | 2•089 (1•259-3•467)    | 0•0044  |

**Supplementary Table 3:** Results of univariable and multivariable Cox regression analysis of the lncRNA signature and survival in the training set (n=60) and in the combined test and independent cohort (n=119) of ten imputations (Con't)

|                                  |                         | Imputation 8          |         |                        |         |
|----------------------------------|-------------------------|-----------------------|---------|------------------------|---------|
|                                  |                         | Univariable analysis  |         | Multivariable analysis |         |
|                                  |                         | Hazard ratio (95% CI) | P       | Hazard ratio (95% CI)  | P       |
| <b>Training set</b>              |                         |                       |         |                        |         |
| Age                              | >60/≤60                 | 1•595 (0•821-3•098)   | 0•1680  | 2•366 (1•191-4•701)    | 0•0140  |
| Gender                           | Female/Male             | 1•233 (0•561-2•707)   | 0•6022  |                        |         |
| Tobacco use                      | Y/N                     | 0•693 (0•357-1•346)   | 0•2790  |                        |         |
| Alcohol use                      | Y/N                     | 0•896 (0•464-1•732)   | 0•7445  |                        |         |
| Tumor location                   | Upper, middle/lower     | 1•249 (0•602-2•591)   | 0•5504  |                        |         |
| Tumor grade                      | moderately, poorly/Well | 1•569 (0•685-3•592)   | 0•2863  |                        |         |
| T                                | T3, T4/T1, T2           | 0•767 (0•319-1•845)   | 0•5540  |                        |         |
| N                                | N1, N2, N3/N0           | 1•960 (0•974-3•943)   | 0•0592  |                        |         |
| TNM                              | III/I, II               | 2•506 (1•202-5•226)   | 0•0143  |                        |         |
| Pneumonia                        | Y/N                     | 1•050 (0•144-7•672)   | 0•9614  |                        |         |
| Anastomotic leak                 | Y/N                     | 2•716 (0•829-8•892)   | 0•0987  | 5•805 (1•605-21•000)   | 0•0073  |
| Arrhythmia                       | Y/N                     | 1•416 (0•706-2•837)   | 0•3271  |                        |         |
| Adjuvant therapy                 | Y/N                     | 1•988 (0•952-4•152)   | 0•0673  |                        |         |
| lncRNA signature                 | High risk/low risk      | 6•578 (2•837-15•252)  | <0•0001 | 8•486 (3•550-20•284)   | <0•0001 |
| <b>Test + independent cohort</b> |                         |                       |         |                        |         |
| Age                              | >60/≤60                 | 1•724 (1•072-2•774)   | 0•0246  | 1•646 (1•016-2•667)    | 0•0430  |
| Gender                           | Female/Male             | 1•283 (0•714-2•306)   | 0•4045  |                        |         |
| Tobacco use                      | Y/N                     | 0•788 (0•488-1•272)   | 0•3295  |                        |         |
| Alcohol use                      | Y/N                     | 0•866 (0•539-1•390)   | 0•5501  |                        |         |
| Tumor location                   | Upper, middle/lower     | 1•184 (0•719-1•951)   | 0•5065  |                        |         |
| Tumor grade                      | moderately, poorly/Well | 0•982 (0•502-1•919)   | 0•9571  |                        |         |
| T                                | T3, T4/T1, T2           | 1•237 (0•716-2•183)   | 0•4458  |                        |         |
| N                                | N1, N2, N3/N0           | 2•214 (1•346-3•640)   | 0•0017  |                        |         |
| TNM                              | III/I, II               | 2•031 (1•258-3•278)   | 0•0037  |                        |         |
| Pneumonia                        | Y/N                     | 1•507 (0•721-3•152)   | 0•2759  |                        |         |
| Anastomotic leak                 | Y/N                     | 0•942 (0•343-2•589)   | 0•9085  |                        |         |
| Arrhythmia                       | Y/N                     | 0•976 (0•558-1•705)   | 0•9311  |                        |         |
| Adjuvant therapy                 | Y/N                     | 2•414 (1•296-4•496)   | 0•0055  | 2•471 (1•310-4•663)    | 0•0052  |
| lncRNA signature                 | High risk/low risk      | 2•412 (1•464-3•975)   | 0•0005  | 2•142 (1•294-3•548)    | 0•0031  |



**Supplementary Table 3:** Results of univariable and multivariable Cox regression analysis of the lncRNA signature and survival in the training set (n=60) and in the combined test and independent cohort (n=119) of ten imputations (Con't)

|                                  |                         | Imputation 9          |         |                        |         |
|----------------------------------|-------------------------|-----------------------|---------|------------------------|---------|
|                                  |                         | Univariable analysis  |         | Multivariable analysis |         |
|                                  |                         | Hazard ratio (95% CI) | P       | Hazard ratio (95% CI)  | P       |
| <b>Training set</b>              |                         |                       |         |                        |         |
| Age                              | >60/≤60                 | 1•595 (0•821-3•098)   | 0•1680  | 2•366 (1•191-4•701)    | 0•0140  |
| Gender                           | Female/Male             | 1•233 (0•561-2•707)   | 0•6022  |                        |         |
| Tobacco use                      | Y/N                     | 0•693 (0•357-1•346)   | 0•2790  |                        |         |
| Alcohol use                      | Y/N                     | 0•896 (0•464-1•732)   | 0•7445  |                        |         |
| Tumor location                   | Upper, middle/lower     | 1•249 (0•602-2•591)   | 0•5504  |                        |         |
| Tumor grade                      | moderately, poorly/Well | 1•569 (0•685-3•592)   | 0•2863  |                        |         |
| T                                | T3, T4/T1, T2           | 0•767 (0•319-1•845)   | 0•5540  |                        |         |
| N                                | N1, N2, N3/N0           | 1•960 (0•974-3•943)   | 0•0592  |                        |         |
| TNM                              | III/I, II               | 2•506 (1•202-5•226)   | 0•0143  |                        |         |
| Pneumonia                        | Y/N                     | 1•050 (0•144-7•672)   | 0•9614  |                        |         |
| Anastomotic leak                 | Y/N                     | 2•716 (0•829-8•892)   | 0•0987  | 5•805 (1•605-21•000)   | 0•0073  |
| Arrhythmia                       | Y/N                     | 1•416 (0•706-2•837)   | 0•3271  |                        |         |
| Adjuvant therapy                 | Y/N                     | 1•646 (0•877-3•088)   | 0•1207  |                        |         |
| lncRNA signature                 | High risk/low risk      | 6•578 (2•837-15•252)  | <0•0001 | 8•486 (3•550-20•284)   | <0•0001 |
| <b>Test + independent cohort</b> |                         |                       |         |                        |         |
| Age                              | >60/≤60                 | 1•724 (1•072-2•774)   | 0•0246  |                        |         |
| Gender                           | Female/Male             | 1•283 (0•714-2•306)   | 0•4045  |                        |         |
| Tobacco use                      | Y/N                     | 0•788 (0•488-1•272)   | 0•3295  |                        |         |
| Alcohol use                      | Y/N                     | 0•866 (0•539-1•390)   | 0•5501  |                        |         |
| Tumor location                   | Upper, middle/lower     | 1•184 (0•719-1•951)   | 0•5065  |                        |         |
| Tumor grade                      | moderately, poorly/Well | 0•982 (0•502-1•919)   | 0•9571  |                        |         |
| T                                | T3, T4/T1, T2           | 1•237 (0•716-2•183)   | 0•4458  |                        |         |
| N                                | N1, N2, N3/N0           | 2•214 (1•346-3•640)   | 0•0017  | 1•933 (1•165-3•205)    | 0•0107  |
| TNM                              | III/I, II               | 2•031 (1•258-3•278)   | 0•0037  |                        |         |
| Pneumonia                        | Y/N                     | 1•507 (0•721-3•152)   | 0•2759  |                        |         |
| Anastomotic leak                 | Y/N                     | 0•942 (0•343-2•589)   | 0•9085  |                        |         |
| Arrhythmia                       | Y/N                     | 0•976 (0•558-1•705)   | 0•9311  |                        |         |
| Adjuvant therapy                 | Y/N                     | 2•150 (1•191-3•880)   | 0•0111  |                        |         |
| lncRNA signature                 | High risk/low risk      | 2•412 (1•464-3•975)   | 0•0005  | 2•144 (1•291-3•562)    | 0•0032  |

**Supplementary Table 3:** Results of univariable and multivariable Cox regression analysis of the lncRNA signature and survival in the training set (n=60) and in the combined test and independent cohort (n=119) of ten imputations (Con't)

|                                  |                         | Imputation 10         |         |                        |         |
|----------------------------------|-------------------------|-----------------------|---------|------------------------|---------|
|                                  |                         | Univariable analysis  |         | Multivariable analysis |         |
|                                  |                         | Hazard ratio (95% CI) | P       | Hazard ratio (95% CI)  | P       |
| <b>Training set</b>              |                         |                       |         |                        |         |
| Age                              | >60/≤60                 | 1•595 (0•821-3•098)   | 0•1680  | 2•890 (1•402-5•959)    | 0•0041  |
| Gender                           | Female/Male             | 1•233 (0•561-2•707)   | 0•6022  |                        |         |
| Tobacco use                      | Y/N                     | 0•693 (0•357-1•346)   | 0•2790  |                        |         |
| Alcohol use                      | Y/N                     | 0•896 (0•464-1•732)   | 0•7445  |                        |         |
| Tumor location                   | Upper, middle/lower     | 1•249 (0•602-2•591)   | 0•5504  |                        |         |
| Tumor grade                      | moderately, poorly/Well | 1•569 (0•685-3•592)   | 0•2863  |                        |         |
| T                                | T3, T4/T1, T2           | 0•767 (0•319-1•845)   | 0•5540  |                        |         |
| N                                | N1, N2, N3/N0           | 1•960 (0•974-3•943)   | 0•0592  |                        |         |
| TNM                              | III/I, II               | 2•506 (1•202-5•226)   | 0•0143  |                        |         |
| Pneumonia                        | Y/N                     | 1•050 (0•144-7•672)   | 0•9614  |                        |         |
| Anastomotic leak                 | Y/N                     | 2•716 (0•829-8•892)   | 0•0987  | 4•151 (1•102-15•637)   | 0•0354  |
| Arrhythmia                       | Y/N                     | 1•416 (0•706-2•837)   | 0•3271  |                        |         |
| Adjuvant therapy                 | Y/N                     | 2•122 (1•005-4•480)   | 0•0484  | 2•246 (0•997-5•060)    | 0•0507  |
| lncRNA signature                 | High risk/low risk      | 6•578 (2•837-15•252)  | <0•0001 | 9•235 (3•791-22•492)   | <0•0001 |
| <b>Test + independent cohort</b> |                         |                       |         |                        |         |
| Age                              | >60/≤60                 | 1•724 (1•072-2•774)   | 0•0246  | 1•726 (1•062-2•804)    | 0•0276  |
| Gender                           | Female/Male             | 1•283 (0•714-2•306)   | 0•4045  |                        |         |
| Tobacco use                      | Y/N                     | 0•788 (0•488-1•272)   | 0•3295  |                        |         |
| Alcohol use                      | Y/N                     | 0•866 (0•539-1•390)   | 0•5501  |                        |         |
| Tumor location                   | Upper, middle/lower     | 1•184 (0•719-1•951)   | 0•5065  |                        |         |
| Tumor grade                      | moderately, poorly/Well | 0•982 (0•502-1•919)   | 0•9571  |                        |         |
| T                                | T3, T4/T1, T2           | 1•237 (0•716-2•183)   | 0•4458  |                        |         |
| N                                | N1, N2, N3/N0           | 2•214 (1•346-3•640)   | 0•0017  |                        |         |
| TNM                              | III/I, II               | 2•031 (1•258-3•278)   | 0•0037  |                        |         |
| Pneumonia                        | Y/N                     | 1•507 (0•721-3•152)   | 0•2759  |                        |         |
| Anastomotic leak                 | Y/N                     | 0•942 (0•343-2•589)   | 0•9085  |                        |         |
| Arrhythmia                       | Y/N                     | 0•976 (0•558-1•705)   | 0•9311  |                        |         |
| Adjuvant therapy                 | Y/N                     | 2•584 (1•350-4•948)   | 0•0042  | 2•694 (1•391-5•220)    | 0•0033  |
| lncRNA signature                 | High risk/low risk      | 2•412 (1•464-3•975)   | 0•0005  | 2•096 (1•264-3•477)    | 0•0041  |

**Supplementary Table 3:** Results of univariable and multivariable Cox regression analysis of the lncRNA signature and survival in the training set (n=60) and in the combined test and independent cohort (n=119) of ten imputations (Con't)

|                                  |                         | Combining inference       |                             |
|----------------------------------|-------------------------|---------------------------|-----------------------------|
|                                  |                         | Univariable analysis<br>P | Multivariable analysis<br>P |
| <b>Training set</b>              |                         |                           |                             |
| Age                              | >60/≤60                 | 0•1680                    | 0•0042                      |
| Gender                           | Female/Male             | 0•6022                    | 0•2122                      |
| Tobacco use                      | Y/N                     | 0•2790                    | 0•6200                      |
| Alcohol use                      | Y/N                     | 0•7445                    | 0•1376                      |
| Tumor location                   | Upper, middle/lower     | 0•5504                    | 0•5833                      |
| Tumor grade                      | moderately, poorly/Well | 0•2863                    | 0•3588                      |
| T                                | T3, T4/T1, T2           | 0•5540                    | 0•0031                      |
| N                                | N1, N2, N3/N0           | 0•0592                    | 0•0077                      |
| TNM                              | III/I, II               | 0•0143                    | 0•0014                      |
| Pneumonia                        | Y/N                     | 0•9614                    | 0•7699                      |
| Anastomotic leak                 | Y/N                     | 0•0987                    | 0•3841                      |
| Arrhythmia                       | Y/N                     | 0•3271                    | 0•2905                      |
| Adjuvant therapy                 | Y/N                     | 0•1694                    | 0•3694                      |
| lncRNA signature                 | High risk/low risk      | <0•0001                   | <0•0001                     |
| <b>Test + independent cohort</b> |                         |                           |                             |
| Age                              | >60/≤60                 | 0•0246                    | 0•0150                      |
| Gender                           | Female/Male             | 0•4045                    | 0•5880                      |
| Tobacco use                      | Y/N                     | 0•3295                    | 0•6391                      |
| Alcohol use                      | Y/N                     | 0•5501                    | 0•6099                      |
| Tumor location                   | Upper, middle/lower     | 0•5065                    | 0•0575                      |
| Tumor grade                      | moderately, poorly/Well | 0•9571                    | 0•5293                      |
| T                                | T3, T4/T1, T2           | 0•4458                    | 0•9236                      |
| N                                | N1, N2, N3/N0           | 0•0017                    | 0•2243                      |
| TNM                              | III/I, II               | 0•0037                    | 0•7298                      |
| Pneumonia                        | Y/N                     | 0•2759                    | 0•3370                      |
| Anastomotic leak                 | Y/N                     | 0•9085                    | 0•2321                      |
| Arrhythmia                       | Y/N                     | 0•9311                    | 0•4478                      |
| Adjuvant therapy                 | Y/N                     | 0•0077                    | 0•0406                      |
| lncRNA signature                 | High risk/low risk      | 0•0005                    | 0•0185                      |
