# Supplementary material for: LncRNA profile study reveals a three-lncRNA signature associated with the survival of patients with oesophageal squamous cell carcinoma
Source: HighWire-hosted journal article supplement (doi:10.1136/gutjnl-2013-305806), 2014-02-12
Supplement: gutjnl-2013-305806supp_table4.pdf [file gutjnl-2013-305806supp_table4.pdf]

**Supplementary Table 4. The p values of log-rank survival analysis of the three-lncRNA signature and the less-than-three-lncRNA signatures in the training, test, and independent data sets.**

|                               |   | Training set | Test set | Independent cohort |
|-------------------------------|---|--------------|----------|--------------------|
| <b>three-lncRNA signature</b> |   | <0.0001      | 0.0030   | 0.0187             |
| <b>two-lncRNA signature</b>   |   |              |          |                    |
| ENST00000435885.1             | + | 0.0007       | 0.2579   | 0.3614             |
| XLOC_013014                   |   |              |          |                    |
| ENST00000435885.1             | + | <0.0001      | 0.0113   | 0.2941             |
| ENST00000547963.1             |   |              |          |                    |
| XLOC_013014                   | + | 0.1069       | 0.1052   | 0.8029             |
| ENST00000547963.1             |   |              |          |                    |
| <b>one-lncRNA signature</b>   |   |              |          |                    |
| ENST00000435885.1             |   | 0.0127       | 0.1037   | 0.5712             |
| XLOC_013014                   |   | 0.0013       | 0.0232   | 0.7894             |
| ENST00000547963.1             |   | 0.3902       | 0.0616   | 0.3025             |
