# Supplementary material for: LncRNA profile study reveals a three-lncRNA signature associated with the survival of patients with oesophageal squamous cell carcinoma
Source: HighWire-hosted journal article supplement (doi:10.1136/gutjnl-2013-305806), 2014-02-12
Supplement: gutjnl-2013-305806supp_table5.pdf [file gutjnl-2013-305806supp_table5.pdf]

**Supplementary Table 5: Biological function analysis for protein coding genes with positive expressional correlation to lncRNAs of the signature (Only GO biological process terms with Benjamini corrected p value < E-2 are shown).**

| Annotation Cluster 1 | Enrichment Score:                          |       |          |                                                                                                                                                                                                            |           |
|----------------------|--------------------------------------------|-------|----------|------------------------------------------------------------------------------------------------------------------------------------------------------------------------------------------------------------|-----------|
| Category             | Term                                       | Count | PValue   | Genes                                                                                                                                                                                                      | Benjamini |
| GOTERM_BP_FAT        | GO:0030216~keratinocyte differentiation    | 22    | 2.08E-24 | LCE3A, LCE3B, LCE3C, LCE3D, ANXA1, SPRR2G, SPRR2F, SPRR2E, SCEL, EVPL, SPRR2C, SPRR2D, SPRR1A, PPL, LCE1C, SPRR1B, SPRR2A, SPRR2B, CNFN, TGM1, LCE3E, CSTA, IVL                                            | 2.32E-21  |
| GOTERM_BP_FAT        | GO:0031424~keratinization                  | 19    | 1.24E-23 | LCE3A, LCE3B, LCE3C, LCE3D, SPRR2G, SPRR2F, SPRR2E, EVPL, SPRR2C, SPRR2D, SPRR1A, PPL, LCE1C, SPRR1B, SPRR2A, SPRR2B, CNFN, TGM1, LCE3E, IVL                                                               | 6.92E-21  |
| GOTERM_BP_FAT        | GO:0009913~epidermal cell differentiation  | 22    | 1.69E-23 | LCE3A, LCE3B, LCE3C, LCE3D, ANXA1, SPRR2G, SPRR2F, SPRR2E, SCEL, EVPL, SPRR2C, SPRR2D, SPRR1A, PPL, LCE1C, SPRR1B, SPRR2A, SPRR2B, CNFN, TGM1, LCE3E, CSTA, IVL                                            | 6.28E-21  |
| GOTERM_BP_FAT        | GO:0007398~ectoderm development            | 28    | 1.74E-20 | KRT6B, LCE3A, LCE3B, LCE3C, LCE3D, SPRR2G, SPRR2F, SPRR2E, SPRR2C, SPRR2D, PPL, SPRR2A, SPRR2B, TGM1, ALOX12B, TGM5, IVL, ANXA1, GRHL3, SCEL, EVPL, SPRR1A, LCE1C, SPRR1B, CNFN, CSTA, PTCH2, LCE3E, KRT71 | 4.85E-18  |
| GOTERM_BP_FAT        | GO:0008544~epidermis development           | 27    | 3.28E-20 | LCE3A, LCE3B, LCE3C, LCE3D, SPRR2G, SPRR2F, SPRR2E, SPRR2C, SPRR2D, PPL, SPRR2A, SPRR2B, TGM1, ALOX12B, TGM5, IVL, ANXA1, GRHL3, SCEL, EVPL, SPRR1A, LCE1C, SPRR1B, CNFN, CSTA, PTCH2, LCE3E, KRT71        | 7.30E-18  |
| GOTERM_BP_FAT        | GO:0030855~epithelial cell differentiation | 24    | 1.02E-19 | LCE3A, ONECUT1, LCE3B, LCE3C, LCE3D, SPRR2G, SPRR2F, SPRR2E, SPRR2C, SPRR2D, SPRR2A, PPL, TGM1, SPRR2B, IVL, ANXA1, SCEL, EVPL, RHCG, SPRR1A, SPRR1B, LCE1C, CNFN, CSTA, LCE3E                             | 1.90E-17  |
| GOTERM_BP_FAT        | GO:0060429~epithelium development          | 24    | 1.03E-14 | LCE3A, ONECUT1, LCE3B, LCE3C, LCE3D, SPRR2G, SPRR2F, SPRR2E, SPRR2C, SPRR2D, SPRR2A, PPL, TGM1, SPRR2B, IVL, ANXA1, SCEL, EVPL, RHCG, SPRR1A, SPRR1B, LCE1C, CNFN, CSTA, LCE3E                             | 1.64E-12  |
