# Supplementary material for: LncRNA profile study reveals a three-lncRNA signature associated with the survival of patients with oesophageal squamous cell carcinoma
Source: HighWire-hosted journal article supplement (doi:10.1136/gutjnl-2013-305806), 2014-02-12
Supplement: gutjnl-2013-305806supp_table6.pdf [file gutjnl-2013-305806supp_table6.pdf]

**Supplementary Table 6: Biological function analysis for protein coding genes with negative expressional correlation to lncRNAs of the signature (Only GO biological process terms with Benjamini corrected p value < E-2 are shown).**

| Annotation Cluster 1 Enrichment Score: 4.555732289721201 |                               |       |          |                                                                                                                                                                                                                                                                                                                                                                                                                                                                                                                                                                                                                                                                                                                                                                                |           |
|----------------------------------------------------------|-------------------------------|-------|----------|--------------------------------------------------------------------------------------------------------------------------------------------------------------------------------------------------------------------------------------------------------------------------------------------------------------------------------------------------------------------------------------------------------------------------------------------------------------------------------------------------------------------------------------------------------------------------------------------------------------------------------------------------------------------------------------------------------------------------------------------------------------------------------|-----------|
| Category                                                 | Term                          | Count | PValue   | Genes                                                                                                                                                                                                                                                                                                                                                                                                                                                                                                                                                                                                                                                                                                                                                                          | Benjamini |
| GOTERM_BP_FAT                                            | GO:0007049~cell cycle         | 107   | 5.46E-08 | SEPT4, RAD51C, SEPT3, RBM7, FOXO4, WTAP, CTNNB1, CUL2, MEI1, NUP37, TUBG1, CUL1, ZC3HC1, CGRRF1, CHTF8, HMG20B, PPP1CC, DCTN3, ESCO2, DCTN2, RAD1, HHEX, DCLRE1A, PPP1CA, MAD2L1, PSMA5, MAD2L2, SEPT7, UBA52, EID1, ANAPC13, TIPIN, CHEK1, ANAPC11, CHEK2, CDC34, CCNG1, ITGB1, PIN1, SPC24, PSMB5, TUBB, GADD45GIP1, PSMB3, PSMB2, FBXO5, CKAP2, SSSCA1, YEATS4, CCPG1, CDC20, PMF1, TET2, CDC27, SUV39H2, RNF8, PSMC3, UTP14C, SPIN1, KIAA0174, E2F6, MLH1, KIF2B, MCM7, EVI5, PSMD1, PSMD2, ZW10, PSMD9, ARL2, BANP, PBK, CDK5, EML4, PPM1G, PPM1D, RIF1, NSL1, UBC, HAUS7, PSME3, HAUS8, IL12B, GADD45A, ACVR1, DHH, PPP6C, HAUS6, HAUS2, BCCIP, CENPA, HINFP, BUB3, APC, MSH6, TXNL4B, GMNN, DLGAP5, CENPJ, SIRT2, PSMD13, GSPT1, PSMD11, PTP4A1, VPS24, TEX11, TP53INP1 | 1.80E-04  |
| GOTERM_BP_FAT                                            | GO:0000278~mitotic cell cycle | 62    | 7.42E-08 | E2F6, FOXO4, KIF2B, CUL2, PSMD1, PSMD2, NUP37, CUL1, ZW10, PSMD9, ZC3HC1, PBK, DCTN3, EML4, DCTN2, PPM1D, DCLRE1A, MAD2L1, PSMA5, NSL1, UBC, HAUS7, PSME3, HAUS8, MAD2L2, SEPT7, GADD45A, UBA52, ACVR1, PPP6C, HAUS6, ANAPC13, HAUS2, TIPIN, CHEK1, CDC34, ANAPC11, CCNG1, ITGB1, PSMB5, SPC24, TUBB, CENPA, PSMB3, PSMB2, HINFP, FBXO5, BUB3, APC, SSSCA1, YEATS4, TXNL4B, DLGAP5, CDC20, PMF1, CDC27, SIRT2, RNF8, PSMD13, GSPT1, PSMC3, PSMD11                                                                                                                                                                                                                                                                                                                              | 8.15E-05  |
| GOTERM_BP_FAT                                            | GO:0022402~cell cycle process | 79    | 2.28E-06 | RAD51C, E2F6, MLH1, RBM7, FOXO4, CTNNB1, KIF2B, CUL2, MEI1, PSMD1, PSMD2, NUP37, TUBG1, CUL1, ZW10, PSMD9, CGRRF1, ZC3HC1, PBK, DCTN3, EML4, DCTN2, RAD1, PPM1G, PPM1D, DCLRE1A, MAD2L1, PSMA5, NSL1, UBC, PSME3, HAUS7, IL12B, HAUS8, MAD2L2, SEPT7, GADD45A, UBA52, ACVR1, PPP6C, DHH, HAUS6, ANAPC13, HAUS2, TIPIN, CHEK1, CDC34, ANAPC11, CCNG1, ITGB1, PSMB5, SPC24, TUBB, CENPA, PSMB3, PSMB2, HINFP, FBXO5, BUB3, APC, SSSCA1, MSH6, YEATS4, TXNL4B, DLGAP5, CDC20, PMF1, CDC27, CENPJ, SIRT2, SUV39H2, RNF8, PSMD13, GSPT1, PSMC3, PSMD11, UTP14C, TP53INP1, TEX11                                                                                                                                                                                                     | 0.001072  |
| GOTERM_BP_FAT                                            | GO:0022403~cell cycle phase   | 59    | 2.95E-05 | RAD51C, E2F6, MLH1, RBM7, FOXO4, KIF2B, MEI1, CUL2, NUP37, TUBG1, CUL1, ZW10, ZC3HC1, PBK, DCTN3, EML4, DCTN2, RAD1, DCLRE1A, PPM1D, MAD2L1, NSL1, HAUS7, HAUS8, MAD2L2, SEPT7, GADD45A, ACVR1, PPP6C, HAUS6, ANAPC13, HAUS2, TIPIN, CHEK1, CDC34, ANAPC11, CCNG1, ITGB1, SPC24, TUBB, HINFP, FBXO5, BUB3, APC, SSSCA1, MSH6, YEATS4, TXNL4B, DLGAP5, CDC20, PMF1, CDC27, SIRT2, SUV39H2, RNF8, PSMD13, GSPT1, UTP14C, TEX11                                                                                                                                                                                                                                                                                                                                                   | 0.004621  |
| GOTERM_BP_FAT                                            | GO:0048285~organelle fission  | 38    | 4.25E-05 | HAUS6, COX10, ANAPC13, HAUS2, TIPIN, ANAPC11, CCNG1, PEX11G, SPC24, KIF2B, FIS1, TUBB, FBXO5, NUP37, BUB3, ZW10, APC, SSSCA1, TXNL4B, YEATS4, ZC3HC1, DLGAP5, CDC20, PBK, PMF1,                                                                                                                                                                                                                                                                                                                                                                                                                                                                                                                                                                                                | 0.005808  |

|                                                           |                                                                                                           |       |          | DCTN3, CDC27, SIRT2, DCTN2, EML4, RNF8, DCLRE1A, MAD2L1, NSL1, HAUS7, HAUS8, MAD2L2, SEPT7                                                                             |           |
|-----------------------------------------------------------|-----------------------------------------------------------------------------------------------------------|-------|----------|------------------------------------------------------------------------------------------------------------------------------------------------------------------------|-----------|
| Annotation Cluster 2 Enrichment Score: 4.4572626214809095 |                                                                                                           |       |          |                                                                                                                                                                        |           |
| Category                                                  | Term                                                                                                      | Count | PValue   | Genes                                                                                                                                                                  | Benjamini |
| GOTERM_BP_FAT                                             | GO:0051340~regulation of ligase activity                                                                  | 24    | 6.77E-08 | SMAD7, CDC20, ANAPC11, FEM1A, CDC27, PIN1, PSMB5, PSMD13, MAD2L1, PSMA5, PSMC3, PSMD11, PSMB3, PSMB2, PSMD1, UBC, PSMD2, FBXO5, PSME3, NHEJ1, UBA52, CUL1, BUB3, PSMD9 | 1.12E-04  |
| GOTERM_BP_FAT                                             | GO:0051438~regulation of ubiquitin-protein ligase activity                                                | 23    | 1.49E-07 | SMAD7, CDC20, ANAPC11, FEM1A, CDC27, PIN1, PSMB5, PSMD13, MAD2L1, PSMA5, PSMC3, PSMD11, PSMB3, PSMB2, PSMD1, UBC, PSMD2, FBXO5, PSME3, UBA52, BUB3, CUL1, PSMD9        | 1.22E-04  |
| GOTERM_BP_FAT                                             | GO:0051444~negative regulation of ubiquitin-protein ligase activity                                       | 20    | 9.50E-07 | SMAD7, CDC20, ANAPC11, CDC27, PSMB5, PSMD13, MAD2L1, PSMA5, PSMC3, PSMD11, PSMB3, PSMB2, PSMD1, UBC, PSMD2, FBXO5, PSME3, UBA52, BUB3, PSMD9                           | 6.26E-04  |
| GOTERM_BP_FAT                                             | GO:0051352~negative regulation of ligase activity                                                         | 20    | 9.50E-07 | SMAD7, CDC20, ANAPC11, CDC27, PSMB5, PSMD13, MAD2L1, PSMA5, PSMC3, PSMD11, PSMB3, PSMB2, PSMD1, UBC, PSMD2, FBXO5, PSME3, UBA52, BUB3, PSMD9                           | 6.26E-04  |
| GOTERM_BP_FAT                                             | GO:0031397~negative regulation of protein ubiquitination                                                  | 21    | 1.15E-06 | SMAD7, CDC20, ANAPC11, CDC27, CDK5, PSMB5, PSMD13, MAD2L1, PSMA5, PSMC3, PSMD11, PSMB3, PSMB2, PSMD1, UBC, PSMD2, FBXO5, PSME3, UBA52, BUB3, PSMD9                     | 6.30E-04  |
| GOTERM_BP_FAT                                             | GO:0051439~regulation of ubiquitin-protein ligase activity during mitotic cell cycle                      | 20    | 2.49E-06 | CDC20, ANAPC11, CDC27, PSMB5, PSMD13, MAD2L1, PSMA5, PSMC3, PSMD11, PSMB3, PSMB2, PSMD1, UBC, PSMD2, FBXO5, PSME3, UBA52, BUB3, CUL1, PSMD9                            | 0.001026  |
| GOTERM_BP_FAT                                             | GO:0051436~negative regulation of ubiquitin-protein ligase activity during mitotic cell cycle             | 19    | 2.67E-06 | CDC20, ANAPC11, CDC27, PSMB5, PSMD13, MAD2L1, PSMC3, PSMD11, PSMA5, PSMB3, PSMB2, PSMD1, UBC, PSMD2, FBXO5, PSME3, UBA52, BUB3, PSMD9                                  | 9.77E-04  |
| GOTERM_BP_FAT                                             | GO:0051351~positive regulation of ligase activity                                                         | 20    | 3.91E-06 | CDC20, ANAPC11, CDC27, PIN1, PSMB5, PSMD13, PSMC3, PSMD11, PSMA5, PSMB3, PSMB2, PSMD1, UBC, PSMD2, FBXO5, PSME3, NHEJ1, UBA52, CUL1, PSMD9                             | 0.001288  |
| GOTERM_BP_FAT                                             | GO:0031396~regulation of protein ubiquitination                                                           | 24    | 3.94E-06 | SMAD7, CDC20, ANAPC11, FEM1A, CDC27, CDK5, PIN1, PSMB5, PSMD13, MAD2L1, PSMA5, PSMC3, PSMD11, PSMB3, PSMB2, PSMD1, UBC, PSMD2, FBXO5, PSME3, UBA52, BUB3, CUL1, PSMD9  | 0.001178  |
| GOTERM_BP_FAT                                             | GO:0051443~positive regulation of ubiquitin-protein ligase activity                                       | 19    | 8.41E-06 | CDC20, ANAPC11, CDC27, PIN1, PSMB5, PSMD13, PSMC3, PSMD11, PSMA5, PSMB3, PSMB2, PSMD1, UBC, PSMD2, FBXO5, PSME3, UBA52, CUL1, PSMD9                                    | 0.001977  |
| GOTERM_BP_FAT                                             | GO:0031145~anaphase-promoting complex-dependent proteasomal ubiquitin-dependent protein catabolic process | 18    | 1.17E-05 | CDC20, ANAPC11, CDC27, PSMB5, MAD2L1, PSMD13, PSMC3, PSMD11, PSMA5, PSMB3, PSMB2, PSMD1, UBC, PSMD2, PSME3, UBA52, BUB3, PSMD9                                         | 0.002401  |
| GOTERM_BP_FAT                                             | GO:0010498~proteasomal protein catabolic process                                                          | 23    | 1.89E-05 | TBL1XR1, CDC20, EDEM3, ANAPC11, EDEM1, CDC27, SELS, PSMB5, PSMD13, MAD2L1, PSMA5, PSMC3, PSMD11, PSMB3, PSMB2, PPP2CB, PSMD1, UBC, PSMD2, PSME3, UBA52, BUB3, PSMD9    | 0.003273  |

|               |                                                                                               |    |          |                                                                                                                                                                     |          |
|---------------|-----------------------------------------------------------------------------------------------|----|----------|---------------------------------------------------------------------------------------------------------------------------------------------------------------------|----------|
| GOTERM_BP_FAT | GO:0043161~proteasomal ubiquitin-dependent protein catabolic process                          | 23 | 1.89E-05 | TBL1XR1, CDC20, EDEM3, ANAPC11, EDEM1, CDC27, SELS, PSMB5, PSMD13, MAD2L1, PSMA5, PSMC3, PSMD11, PSMB3, PSMB2, PPP2CB, PSMD1, UBC, PSMD2, PSME3, UBA52, BUB3, PSMD9 | 0.003273 |
| GOTERM_BP_FAT | GO:0051437~positive regulation of ubiquitin-protein ligase activity during mitotic cell cycle | 18 | 2.23E-05 | CDC20, ANAPC11, CDC27, PSMB5, PSMD13, PSMC3, PSMD11, PSMA5, PSMB3, PSMB2, PSMD1, UBC, PSMD2, FBXO5, PSME3, UBA52, CUL1, PSMD9                                       | 0.003657 |
| GOTERM_BP_FAT | GO:0031398~positive regulation of protein ubiquitination                                      | 20 | 3.44E-05 | SMAD7, CDC20, ANAPC11, CDC27, PIN1, PSMB5, PSMD13, PSMC3, PSMD11, PSMA5, PSMB3, PSMB2, PSMD1, UBC, PSMD2, FBXO5, PSME3, UBA52, CUL1, PSMD9                          | 0.005129 |

Annotation Cluster 3 Enrichment Score: 4.339863612496553

| Category      | Term                                             | Count | PValue   | Genes                                                                                                                                                                                                                                                                                                                                                                                                                                                                                                                                                                                                                                                                                      | Benjamini |
|---------------|--------------------------------------------------|-------|----------|--------------------------------------------------------------------------------------------------------------------------------------------------------------------------------------------------------------------------------------------------------------------------------------------------------------------------------------------------------------------------------------------------------------------------------------------------------------------------------------------------------------------------------------------------------------------------------------------------------------------------------------------------------------------------------------------|-----------|
| GOTERM_BP_FAT | GO:0045184~establishment of protein localization | 95    | 3.60E-05 | COPA, SEC24A, MSR1, RAB9B, LMAN2L, UNC50, CHMP7, USE1, EIF5A, FGF10, PEX3, CLTC, CANX, VPS33A, AIP, FAM125A, HOMER3, DNAJC14, NECAP1, NUP37, STAM, NUP35, RAMP1, ZW10, RAMP3, SCAMP2, SNUPN, RAB4B, FUT10, AP4M1, NLRP3, TIMM23, TIMM44, YIF1A, CDK5, PRKCB, TRAM1L1, MYRIP, ATG4C, VAMP7, TOMM20, RAB14, SNX11, LCP2, BID, RAB3C, NUP160, SNX14, MTX1, PPT1, SEC62, SFT2D1, SLC11A1, RAB43, TOMM6, TMED3, STX18, HINFP, SEC22C, SCG5, SNAP23, APPBP2, STX11, STX10, TRAM1, EXOC2, SNX20, EIF4ENIF1, SYS1, RAB2B, RILP, GDI2, RAB8B, CUBN, VTA1, SNAPIN, RAB33A, SELS, ABCG1, LIN7A, PREB, RAB32, SCFD1, RAB30, COG6, YWHAH, TOM1L1, RAB34, VPS24, TRPC4AP, SEC13, YIPF5, NUTF2, SSR4, F2R | 0.005141  |
| GOTERM_BP_FAT | GO:0015031~protein transport                     | 94    | 4.26E-05 | COPA, SEC24A, MSR1, RAB9B, LMAN2L, UNC50, CHMP7, USE1, EIF5A, FGF10, PEX3, CLTC, CANX, VPS33A, AIP, FAM125A, HOMER3, DNAJC14, NECAP1, NUP37, STAM, NUP35, RAMP1, ZW10, RAMP3, SCAMP2, SNUPN, RAB4B, FUT10, AP4M1, NLRP3, TIMM23, TIMM44, YIF1A, CDK5, PRKCB, TRAM1L1, MYRIP, ATG4C, VAMP7, TOMM20, RAB14, SNX11, LCP2, BID, RAB3C, NUP160, SNX14, MTX1, PPT1, SEC62, SFT2D1, SLC11A1, RAB43, TOMM6, TMED3, STX18, SEC22C, SCG5, SNAP23, APPBP2, STX11, STX10, TRAM1, EXOC2, SNX20, EIF4ENIF1, SYS1, RAB2B, RILP, GDI2, RAB8B, CUBN, VTA1, SNAPIN, RAB33A, SELS, ABCG1, LIN7A, PREB, RAB32, SCFD1, RAB30, COG6, YWHAH, TOM1L1, RAB34, VPS24, TRPC4AP, SEC13, YIPF5, NUTF2, SSR4, F2R        | 0.005592  |
| GOTERM_BP_FAT | GO:0008104~protein localization                  | 105   | 6.24E-05 | RAB9B, LMAN2L, UNC50, CHMP7, USE1, FGF10, EIF5A, VPS33A, IL10, AIP, CTNBN1, FAM125A, HOMER3, GRIN2C, NUP37, STAM, NUP35, CUTA, SCAMP2, FUT10, AP4M1, YIF1A, TRAM1L1, VAMP7, RAB14, PALM, MTX1, PPT1, SLC11A1, TOMM6, STX18, SUPT7L, STX11, TRAM1, STX10, SYS1, RILP, CUBN, RAB8B, SNAPIN, RAB33A, ABCG1, LIN7A, SEC13, YIPF5, NUTF2, COPA, SEC24A, MSR1, ALG2, PEX3, CLTC, CANX, DNAJC14, TMSB15B, NECAP1, RAMP1, ZW10, RAMP3, SNUPN, RAB4B, NLRP3, TIMM23, TIMM44, CDK5, PRKCB, MYRIP, ATG4C, TOMM20, LCP2, SNX11, BID, RAB3C, NUP160, SNX14, SEC62, SFT2D1, RAB43, TMED3, SH3GLB1, HINFP, SCG5, SEC22C, SNAP23,                                                                          | 0.007869  |

|  |  |  |  |                                                                                                                                                   |  |
|--|--|--|--|---------------------------------------------------------------------------------------------------------------------------------------------------|--|
|  |  |  |  | APPBP2, ERCC3, EXOC2, SNX20, EIF4ENIF1, RAB2B, GDI2, VTA1, SELS, PREB, RAB32, SCFD1, RAB30, YWHAH, COG6, TOM1L1, RAB34, VPS24, TRPC4AP, SSR4, F2R |  |
|--|--|--|--|---------------------------------------------------------------------------------------------------------------------------------------------------|--|

Annotation Cluster 4 Enrichment Score: 3.984160160453971

| Category      | Term                                                | Count | PValue   | Genes                                                                                                                                                                                                                                                                                                                                                                                                                                                                                                                                                                                                                                                                                                                                      | Benjamini |
|---------------|-----------------------------------------------------|-------|----------|--------------------------------------------------------------------------------------------------------------------------------------------------------------------------------------------------------------------------------------------------------------------------------------------------------------------------------------------------------------------------------------------------------------------------------------------------------------------------------------------------------------------------------------------------------------------------------------------------------------------------------------------------------------------------------------------------------------------------------------------|-----------|
| GOTERM_BP_FAT | GO:0044265~cellular macromolecule catabolic process | 94    | 5.92E-06 | RNASEH1, MLH1, SENP7, USP50, CUL2, MAP1LC3C, PSMD1, PSMD2, FBXL12, RNF34, FBXO22, CUL1, KLHL20, USP13, PSMD9, TBL1XR1, ZC3HC1, ADAM10, UBE2MP1, DTL, FBXL20, DFFB, RELA, RING1, UBE2J1, UBE2J2, RNASEH2A, PJA1, MAD2L1, ATG4C, PIAS4, PSMA5, MED8, FBXO18, UBE2M, UBC, RNF25, UCHL5, CAND2, UBE2W, PSME3, SPOPL, UBA52, ASB6, DNAH12, APH1A, ANAPC13, APH1B, RNH1, PPT1, CDC34, ANAPC11, EDEM3, FEM1A, EDEM1, SMUG1, PSMB5, FBXW9, UBE2D4, RPA2, SUMO1, PSMB3, PPP2CB, PSMB2, RNF11, FBXO5, RNF167, PPIL5, FBXO3, ERCC3, NTHL1, FBXO8, BUB3, ERCC1, UBL7, UPF2, RNASE2, CDC20, CDC27, SELS, RNF8, DNASE2, UBE2E3, TXNDC12, GMCL1, PSMD13, TOM1L1, GSPT1, PSMC3, PSMD11, DCP1A, ZRANB1, UBXN6, OGG1, RNF111                                 | 0.001624  |
| GOTERM_BP_FAT | GO:0009057~macromolecule catabolic process          | 99    | 8.50E-06 | USE1, RNASEH1, USP50, CUL2, RNF34, FBXO22, CUL1, ZC3HC1, UBE2MP1, DTL, RELA, DFFB, UBE2J1, UBE2J2, RNASEH2A, MAD2L1, PIAS4, PSMA5, FBXO18, RNF25, UBA52, ASB6, DNAH12, ANAPC13, PPT1, ANAPC11, CDC34, FBXW9, PSMB5, UBE2D4, PSMB3, PSMB2, RNF11, FBXO5, RNF167, FBXO3, PPIL5, NTHL1, FBXO8, CDC20, CDC27, ABCG1, RNF8, DNASE2, TXNDC12, UBE2E3, PSMC3, DCP1A, MLH1, SENP7, MAP1LC3C, PSMD1, PSMD2, FBXL12, KLHL20, PSMD9, USP13, TBL1XR1, CLN3, ADAM10, FBXL20, RING1, CDK5, PJA1, ATG4C, MED8, UBE2M, UBC, UCHL5, UBE2W, CAND2, PSME3, SPOPL, APH1A, APH1B, RNH1, EDEM3, EDEM1, FEM1A, SMUG1, NGLY1, RPA2, SUMO1, PPP2CB, ERCC3, BUB3, ERCC1, UBL7, UPF2, RNASE2, SELS, PSMD13, GMCL1, TOM1L1, GSPT1, PSMD11, ZRANB1, UBXN6, OGG1, RNF111 | 0.001864  |
| GOTERM_BP_FAT | GO:0030163~protein catabolic process                | 79    | 7.43E-05 | USE1, SENP7, USP50, CUL2, MAP1LC3C, PSMD1, PSMD2, FBXL12, RNF34, FBXO22, KLHL20, CUL1, USP13, PSMD9, TBL1XR1, CLN3, ZC3HC1, ADAM10, UBE2MP1, FBXL20, DTL, RELA, RING1, UBE2J1, UBE2J2, PJA1, MAD2L1, ATG4C, PIAS4, PSMA5, FBXO18, MED8, UBE2M, UBC, RNF25, UCHL5, CAND2, UBE2W, PSME3, SPOPL, UBA52, ASB6, DNAH12, APH1A, ANAPC13, APH1B, PPT1, CDC34, EDEM3, ANAPC11, FEM1A, EDEM1, PSMB5, FBXW9, UBE2D4, SUMO1, PSMB3, PPP2CB, PSMB2, RNF11, FBXO5, RNF167, PPIL5, FBXO3, FBXO8, BUB3, UBL7, CDC20, CDC27, SELS, RNF8, UBE2E3, GMCL1, PSMD13, TOM1L1, PSMC3, PSMD11, ZRANB1, UBXN6, RNF111                                                                                                                                               | 0.009016  |

Annotation Cluster 5 Enrichment Score: 3.4037107915296896

| Category      | Term                      | Count | PValue   | Genes                                                                                  | Benjamini |
|---------------|---------------------------|-------|----------|----------------------------------------------------------------------------------------|-----------|
| GOTERM_BP_FAT | GO:0006354~RNA elongation | 16    | 8.04E-06 | POLR2F, POLR2L, TAF5, ELL, POLR2I, POLR2D, GTF2B, POLR2B, TAF11, ADRM1, TAF13, GTF2E2, | 0.002035  |

|               |                                                           |    |          |                                                                                                             |          |
|---------------|-----------------------------------------------------------|----|----------|-------------------------------------------------------------------------------------------------------------|----------|
|               |                                                           |    |          | GTF2F1, TCEB3, TCEA2, ERCC3                                                                                 |          |
| GOTERM_BP_FAT | GO:0006368~RNA elongation from RNA polymerase II promoter | 15 | 1.79E-05 | POLR2F, POLR2L, TAF5, ELL, POLR2I, POLR2D, GTF2B, POLR2B, TAF11, ADRM1, TAF13, GTF2E2, GTF2F1, TCEB3, ERCC3 | 0.003264 |
